1 **Regulation of KHNYN antiviral activity by the extended di-KH domain and**  
2 **nucleo-cytoplasmic trafficking**

3

4 Maria José Lista<sup>1</sup>, Rui Pedro Galão<sup>1</sup>, Mattia Ficarelli<sup>1</sup>, Dorota Kmiec<sup>1</sup>, Harry Wilson<sup>1</sup>,  
5 Helena Winstone<sup>1</sup>, Elizabeth R Morris<sup>2</sup>, Hannah E Mischo<sup>1</sup>, Joseph Wanford<sup>1</sup>,  
6 Rebecca Youle<sup>1,2</sup>, Charlotte Odendall<sup>1</sup>, Ian A Taylor<sup>2</sup>, Stuart J D Neil<sup>1\*</sup> and Chad M  
7 Swanson<sup>1\*</sup>

8

9 <sup>1</sup> King's College London, Department of Infectious Diseases, London, United

10 Kingdom

11 <sup>2</sup> The Francis Crick Institute, Macromolecular Structure Laboratory, London, United

12 Kingdom

13

14 \* Corresponding authors: [stuart.neil@kcl.ac.uk](mailto:stuart.neil@kcl.ac.uk), [chad.swanson@kcl.ac.uk](mailto:chad.swanson@kcl.ac.uk)

15

16

17 **ABSTRACT**

18 The zinc finger antiviral protein (ZAP) restricts a broad range of viruses by binding  
19 CpG dinucleotides in viral RNA to target it for degradation and inhibit its translation.  
20 KHNYN was recently identified as an antiviral protein required for ZAP to inhibit  
21 retroviral replication, though little is known about its functional determinants. KHNYN  
22 contains an N-terminal extended di-KH-like domain, a PIN endoribonuclease domain  
23 and a C-terminal CUBAN domain that binds NEDD8 and ubiquitin. We show that  
24 deletion of the extended di-KH domain reduces its antiviral activity. However, despite  
25 its similarity to RNA binding KH domains, the extended di-KH domain in KHNYN  
26 does not appear to bind RNA. Mutation of residues in the CUBAN domain that bind  
27 NEDD8 increase KHNYN abundance but do not alter its antiviral activity, suggesting  
28 that this interaction regulates KHNYN homeostatic turnover. In contrast, a CRM1-  
29 dependent nuclear export signal (NES) at the C-terminus of the CUBAN domain is  
30 required for antiviral activity. Deletion of this signal retains KHNYN in the nucleus  
31 and inhibits its interaction with ZAP. Interestingly, this NES appeared in the KHNYN  
32 lineage at a similar time as when ZAP evolved in tetrapods, indicating that these  
33 proteins may have co-evolved to restrict viral replication.

34

35 **AUTHOR SUMMARY**

36 Antiviral proteins restrict viral replication in many different ways, including inhibiting  
37 viral gene expression. ZAP is an antiviral RNA binding protein that must interact with  
38 other cellular proteins to inhibit viral protein synthesis. KHNYN is a ZAP cofactor that  
39 is required for it to inhibit retroviral replication. Because little is known about how  
40 KHNYN functions in this role, we have analyzed how two of its domains regulate its  
41 antiviral activity. We first show that the extended di-KH domain in KHNYN is required

42 for its antiviral activity. While it is related to di-KH domains in RNA binding proteins, it  
43 appears to have lost its ability to bind RNA and KHNYN likely acts in the restriction  
44 pathway after ZAP binds a target viral RNA. Second, we show that the KHNYN  
45 CUBAN domain regulates both its protein abundance and trafficking within the cell.  
46 The CUBAN domain contains a nuclear export signal and, when this signal is  
47 mutated, KHNYN is sequestered in the nucleus, has substantially reduced antiviral  
48 activity and does not interact with ZAP. Overall, we show that the extended di-KH  
49 and CUBAN domains in KHNYN are required for it to act as a cofactor for ZAP to  
50 restrict viral replication.

51

52

## 53 INTRODUCTION

54 The zinc finger antiviral protein (ZAP, also known as ZC3HAV1 or PARP13) is an  
55 RNA binding protein that targets viral RNA containing CpG dinucleotides for  
56 degradation and inhibits their translation [1]. Unlike many viral RNA sensors, ZAP  
57 binds single stranded RNA instead of double stranded RNA, allowing it to potentially  
58 bind cellular mRNAs [2-4]. Furthermore, as very few cellular transcripts are devoid of  
59 CpGs, ZAP activity must be highly regulated to prevent it from targeting many  
60 cellular mRNAs and causing genome-wide changes in gene expression [1, 5, 6].  
61 ZAP has no intrinsic catalytic activity and has been reported to interact with multiple  
62 cofactors to mediate RNA degradation including DDX17, the RNA exosome  
63 complex, PARN and TRIM25, though these are not required to inhibit all ZAP-  
64 sensitive viruses [7-11]. Therefore, determining how ZAP cofactors contribute to its  
65 activity is essential to understand how this antiviral system mediates potent and  
66 selective restriction. We recently identified KHNYN, a putative endoribonuclease with  
67 no previously known function, as a cofactor required for ZAP to inhibit retroviral  
68 replication [12].

69

70 The name KHNYN is derived from its original annotation that suggested that it  
71 contains a type I K homology (KH) domain and a Nedd4-BP1, YacP-like Nuclease  
72 (NYN) domain [13]. The N-terminal KH domain has been reported to be unusual due  
73 to a metal chelating domain insertion [13], though this has not been characterized.  
74 The NYN domain was originally reported to be similar to the PilT N-terminal (PIN)  
75 nuclease fold and a recent classification of the PIN domain-like superfamily  
76 reclassified this domain in KHNYN from the NYN group to the proteinaceous RNase  
77 P (PRORP) group containing the PRORP enzymes and the ZC3H12 RNase family

78 [13, 14]. All PIN domains have a catalytic core formed from four conserved aspartic  
79 acid residues that coordinate a Mg<sup>2+</sup> ion and we have shown that mutating these  
80 conserved aspartic acid residues eliminates KHNYN antiviral activity [12, 14]. In  
81 addition to the KH and PIN domains, KHNYN also has a C-terminal cullin-binding  
82 domain associating with NEDD8 (CUBAN). This domain binds NEDD8 and ubiquitin,  
83 both of which are members of the ubiquitin-like family, and preferentially binds  
84 monomeric NEDD8 over ubiquitin [15]. NEDD8 binding mediates an interaction  
85 between KHNYN and neddylated cullin–RING E3 ubiquitin ligases. However, the role  
86 of the CUBAN domain for KHNYN antiviral activity, or any other function, is not  
87 known.

88

89 KHNYN has two human paralogs, NYNRIN and N4BP1. NYNRIN evolved from a  
90 KHNYN gene duplication in which the RNase H and integrase domains from an  
91 endogenous retrovirus replaced the last exon of KHNYN [16]. The function of this  
92 protein is unknown. N4BP1 contains domains that are paralogous to the KH domain,  
93 PIN domain and CUBAN domains in KHNYN and it is a predominantly nucleolar  
94 protein whose expression is induced by type I interferon [13, 17-20]. While the  
95 specific functions of N4BP1 are still unclear, it has been shown to inhibit the NF-κB  
96 pathway as well as HIV-1 gene expression and the E3 ligase Itch [21-24]. N4BP1  
97 also has a genetic interaction with ZAP in that ZAP is required for N4BP1 antiviral  
98 activity [25].

99

100 Human immunodeficiency virus type 1 (HIV-1) is a common model system to study  
101 the antiviral activity of ZAP and its cofactors because it is highly depleted in CpG  
102 dinucleotides, which makes it poorly targeted by ZAP [26-28]. However, when a

103 specific region in HIV-1 *env* is engineered to contain additional CpGs through  
104 synonymous mutations, the virus becomes ZAP-sensitive [28-30]. There are two  
105 predominant isoforms for ZAP, ZAP-L and ZAP-S [31, 32]. ZAP-L contains a C-  
106 terminal S-farnesylation modification that localizes it to the cytoplasmic  
107 endomembrane system and it has greater antiviral activity than ZAP-S against some  
108 viruses, including CpG-enriched HIV-1 [32-36]. Importantly, KHNYN physically  
109 interacts with ZAP and is required for ZAP to restrict retroviruses, including CpG-  
110 enriched HIV-1 [12, 29].

111

112 In this study, we characterized how the KH domain and CUBAN domain regulate  
113 KHNYN antiviral activity. In contrast to its original annotation [13], the KH domain is  
114 composed of an extended di-KH domain that appears to be unique to the  
115 KHNYN/N4BP1/NYNRIN family. While it is required for full antiviral activity, it likely  
116 does not bind RNA, at least in a conventional manner. The CUBAN domain has at  
117 least two functions for KHNYN. First, its ability to bind NEDD8 is required for KHNYN  
118 homeostatic turnover but not its antiviral activity. Second, the extreme C-terminus of  
119 the CUBAN domain contains a CRM1 nuclear export signal (NES) that is required for  
120 proper localization of KHNYN to the cytoplasm. This regulates its interaction with  
121 ZAP and is essential for antiviral activity. Furthermore, the NES in KHNYN appears  
122 to have co-evolved with ZAP as two of the five key residues in the NES emerged at  
123 the same time as ZAP evolved in tetrapods.

124

## 125 **RESULTS**

126 **The extended di-KH domain in KHNYN is required for its antiviral activity.**

127 To characterize the domains in KHNYN, we used the Phyre2 protein structure  
128 prediction tool [37]. This identified three major domains: an N-terminal di-KH domain  
129 (residues 10-195), a PIN domain (residues 436-595) and the C-terminal CUBAN  
130 domain (residues 627-678) as well as a long inter-domain region (residues 196-435)  
131 that is predicted to be largely disordered with low hydrophobicity (Figure 1A). A  
132 similar model for this protein was predicted by AlphaFold [38].

133

134 The top-ranked model from the Phyre2 analysis for KHNYN predicts a di-KH domain  
135 with a C-terminal extension from residues 10-195 based on the structure of the  
136 N4BP1 di-KH domain (Table S1). Of note, this differs with the previously published  
137 reports for KHNYN that described one KH domain [12, 13]. Models based on di-KH  
138 domains from the RNA binding proteins FUBP1, IGF2BP1 and KHSRP were also  
139 present in the analysis (Table S1). For the KHNYN di-KH domain model, KH1 is  
140 predicted from residues S10 to P76 while KH2 is predicted for residues L78 to D145  
141 (Figure 1A-C). Type I KH domains consist of three  $\beta$ -strands that form a  $\beta$ -sheet and  
142 three  $\alpha$ -helices that pack onto this surface [39]. Specifically, the sub-domain  
143 structure is  $\beta$ 1- $\alpha$ 1- $\alpha$ 2- $\beta$ 2 followed by a variable loop and  $\beta$ 3- $\alpha$ 3 (Figure 1C). A  
144 hallmark GxxG loop between  $\alpha$ 1 and  $\alpha$ 2 forms one side of a hydrophobic RNA  
145 binding groove with these two  $\alpha$ -helices while the  $\beta$ -sheet and the variable loop form  
146 the other side of the groove. Up to four nucleotides can be specifically recognized by  
147 a KH domain and the phosphates of the first two nucleotides interact with the GxxG  
148 loop. KH domains without the GxxG loop do not bind nucleic acid [39].

149

150 The KHNYN di-KH domain model shows two major differences with conventional di-  
151 KH domains. First, for KH1, the GxxG motif is not present between  $\alpha$ 1- $\alpha$ 2 (Figure

152 1C). Instead,  $\alpha 1$  appears to be elongated compared to that in FUBP1 or IGF2BP1  
153 [40, 41]. Second, while the GxxG loop is present in KH2, an additional C-terminal  
154 three  $\alpha$ -helix bundle (residues Q156 to Q195, cyan in Figure 1B) forms a sub-  
155 domain in which  $\alpha 2$  and  $\alpha 3$  of this module packs against  $\alpha 1$ ,  $\alpha 2$  and  $\alpha 3$  of the KH2  
156 module (blue in Figure 1B). Of note, the model for the elongated di-KH domain is  
157 similar to the AlphaFold model but does not support the previously proposed metal  
158 chelating module [13, 38]. In addition, the three-helix bundle extension has not been  
159 previously observed in other di-KH domain structures [40-44]. An uncharacterized  
160 domain previously named CGIN1 has been found only in KHNYN, N4BP1 and  
161 NYNRIN and this roughly correlates with the di-KH domain plus C-terminal extension  
162 [16]. Therefore, it appears that the KHNYN/N4BP1/NYNRIN family has a novel  
163 domain related to a di-KH domain but with potentially important unique  
164 characteristics and herein we refer to this as the extended di-KH domain.

165

166 In contrast to the extended di-KH domain identified by Phyre2, the SUPERFAMILY  
167 database annotation for KHNYN in Ensembl [45, 46] indicates only one type I KH-  
168 domain extending from residues 58-141. When we previously deleted this region,  
169 KHNYN had reduced antiviral activity [12]. However, this mutant protein localized in  
170 cytoplasmic puncta that were not visible for the wild-type protein, suggesting that this  
171 deletion may have altered the protein's folding and led to its aggregation. To  
172 determine if deleting the extended di-KH domain affects KHNYN antiviral activity, we  
173 made a KHNYN $\Delta$ di-KH construct (Figure 2A) and analyzed its ability to restrict wild-  
174 type and CpG-enriched HIV-1. Of note, these experiments were performed in cells  
175 with endogenous KHNYN knocked out by CRISPR-Cas9-mediated genome  
176 engineering to eliminate the possibility that expression of the endogenous protein



177 could affect the activity of the ectopically expressed protein, such as through  
178 multimerization. As previously shown [12], CRISPR-resistant wild-type KHNYN  
179 potently restricted HIV-1 with 36 CpGs introduced through synonymous mutations in  
180 the 5' end of *env* (HIV-1<sub>CpG</sub>) (Figure 2B and Figure S1). However, deletion of the  
181 extended di-KH domain substantially reduced KHNYN antiviral activity for this virus.  
182 KHNYN $\Delta$ di-KH is expressed at moderately higher levels than wild-type KHNYN and  
183 is localized in the cytoplasm similar to wild-type KHNYN (Figure 2B and 2C),  
184 indicating that differences in its expression or subcellular localization do not account  
185 for its decreased antiviral activity.

186

### 187 **The extended di-KH domain in KHNYN does not mediate RNA binding.**

188 While canonical KH domains with a GxxG motif are found in many RNA binding  
189 proteins, a few proteins have a KH fold without a GxxG motif and do not bind RNA  
190 [39, 47, 48]. Since the GxxG loop in the extended di-KH domain is absent in KH1 but  
191 present in KH2, we tested whether KHNYN may bind RNA through KH2. One  
192 method for characterizing the RNA binding capacity of a KH domain is to make a  
193 rationally designed mutation that impairs RNA binding without altering the domain's  
194 structure. This has typically been undertaken through the introduction of acidic  
195 residues between the glycine residues of the GxxG motif and has been shown to be  
196 a tool to probe whether a KH domain can bind RNA [49]. Therefore, we made a  
197 GAQG to GDDG mutation in KH2 (KHNYN-GDDG, Figure 3A). Interestingly, there  
198 was no loss of antiviral activity for KHNYN-GDDG compared to the wild-type protein  
199 for HIV-1<sub>CpG</sub> (Figure 3B and Figure S2). KHNYN-GDDG localized to the cytoplasm  
200 similar to wild-type KHNYN (Figure 2C). Therefore, while the extended di-KH domain  
201 is required for full antiviral activity, it may not bind RNA because KH1 does not

202 contain a GxxG motif and mutating this motif in KH2 does not affect its ability to  
203 restrict HIV-1<sub>CpG</sub>.  
204  
205 KHNYN is not listed as a human RNA binding protein in RBPbase [50], though this  
206 could be due to its low expression level [51]. Quantitative proteomics have shown  
207 that many of the characterized ZAP cofactors are expressed at much higher levels  
208 than KHNYN (Figure S3A) and there are ~25-fold more ZAP molecules/cell than  
209 KHNYN in HeLa cells [51]. To determine if KHNYN directly bound RNA, we analyzed  
210 whether RNA could be crosslinked by ultraviolet (UV) light to KHNYN in stable cell  
211 lines that express CRISPR-resistant KHNYN-GFP in KHNYN knockout cells. These  
212 cells restricted HIV-1<sub>CpG</sub> and expressed KHNYN at a higher level than the  
213 endogenous protein (Figure S3B-C). Briefly, cells expressing GFP or KHNYN-GFP  
214 were UV-C (254 nm) crosslinked, lysed and either ZAP or GFP were  
215 immunoprecipitated. The samples were treated with RNase I, which cleaves single-  
216 stranded RNA non-specifically and so degrades protein-bound RNA bar a few  
217 nucleotides. The remaining crosslinked RNA was labelled with  $\gamma^{32}\text{P}$ -ATP, the  
218 complexes resolved by SDS-PAGE and visualized using a Phosphorimager after  
219 transfer to a nitrocellulose membrane. The autoradiograph shows two bands in the  
220 ZAP immunoprecipitates corresponding to the size of ZAP-L and ZAP-S,  
221 demonstrating that, as expected, both proteins bind RNA directly (Figure 3C).  
222 Additional bands on the autoradiograph for the ZAP immunoprecipitates presumably  
223 correspond to RNA binding proteins that co-purify with ZAP. In contrast, even though  
224 KHNYN is well expressed (Figure S3C), it does not show specific radiolabeling in the  
225 same samples, indicating that it does not stably bind RNA (Figure 3C).  
226

227 To determine if KHNYN is required for ZAP to bind to CpG-enriched HIV-1, we  
228 immunoprecipitated endogenous ZAP in control and KHNYN knockout HeLa cells  
229 and determined the abundance of the co-purifying HIV-1 RNA using quantitative RT-  
230 PCR. As a control, we also tested the role of the ZAP cofactor TRIM25, which has  
231 previously been shown to be required for optimal ZAP binding to a target RNA with a  
232 ZAP-response element from murine leukemia virus [10]. ZAP binds HIV-1<sub>WT</sub> RNA but  
233 the amount of viral RNA associated with ZAP is higher for HIV-1<sub>CpG</sub> (Figure 3D). This  
234 is consistent with the increased binding of ZAP to the clustered CpGs in HIV-1<sub>CpG</sub>  
235 *env* observed in UV crosslinking and immunoprecipitation sequencing (CLIP-seq)  
236 experiments [28]. As expected, ZAP enrichment on HIV-1<sub>CpG</sub> compared to HIV-1<sub>WT</sub> is  
237 reduced in TRIM25 knockout cells. However, there were similar levels of enrichment  
238 for ZAP binding to HIV-1<sub>CpG</sub> RNA compared to HIV-1<sub>WT</sub> RNA in the control and  
239 KHNYN knockout cells, implying that KHNYN does not affect ZAP binding to CpG-  
240 enriched HIV-1 RNA. Because ZAP is a type I and II interferon-stimulated gene [52,  
241 53], we also tested whether KHNYN was required for ZAP binding to HIV-1<sub>CpG</sub> when  
242 ZAP-L was overexpressed. Similar to the result observed at endogenous ZAP levels,  
243 KHNYN depletion had no effect for ZAP enrichment on HIV-1<sub>CpG</sub> RNA (Figure S3D).  
244 This is consistent with our previous results showing that the sensitivity of different  
245 CpG-enriched HIV-1 genomes to ZAP determines the degree by which they are  
246 restricted by KHNYN [29]. Overall, this suggests that KHNYN is not required for ZAP  
247 to bind HIV-1<sub>CpG</sub> and acts at a later point in the restriction pathway.

248

249 **The CUBAN domain in KHNYN regulates its abundance and subcellular**  
250 **localization.**

251 The C-terminal CUBAN domain in KHNYN (Figure 4A) has been shown to bind both  
252 NEDD8 and ubiquitin, with preferential binding to monomeric NEDD8 over ubiquitin  
253 [15]. This mediates an interaction between KHNYN and the neddylated cullin-RING  
254 E3 ubiquitin ligases, including CUL1, CUL2, CUL3 and CUL4, and raised the  
255 possibility that KHNYN antiviral activity could be regulated by these proteins. To  
256 determine whether the CUBAN domain is required for KHNYN antiviral activity, it  
257 was deleted (KHNYN $\Delta$ CUBAN, Figure 4A) and the ability to restrict HIV-1<sub>CpG</sub> was  
258 measured. Deletion of the CUBAN domain led to a large decrease in KHNYN  
259 antiviral activity, even though KHNYN $\Delta$ CUBAN was expressed at much higher levels  
260 than the wild-type protein (Figure 4B and Figure S4A). This indicates that the domain  
261 may be required for both KHNYN homeostatic turnover and antiviral activity.

262

263 The CUBAN domain comprises a three-helix bundle ( $\alpha$ 1 = T632-R640,  $\alpha$ 2 = K652-  
264 L657,  $\alpha$ 3 = Y662-F678) connected by two loops [15]. The binding interface between  
265 the CUBAN domain and NEDD8 is formed from a negatively charged motif in  
266 NEDD8 and a positively charged surface in the CUBAN  $\alpha$ 2 and surrounding  
267 residues. Three mutations (Figure 4A) have previously been shown to decrease  
268 binding of the CUBAN domain to NEDD8 [15]. H651F and R664E decrease the  
269 electrostatic binding interaction while W647P likely increases the flexibility of loop 1  
270 (Q641-H651). Surprisingly, when these mutations were introduced in KHNYN  
271 (KHNYN-mutNEDD8), they moderately increased its antiviral activity for HIV-1<sub>CpG</sub>  
272 (Figure 4B and Figure S4A). This correlated with increased protein abundance  
273 (Figure 4B), suggesting that the NEDD8 interaction likely regulates KHNYN turnover  
274 but not antiviral activity.

275

276 To analyze the subcellular localization of the mutant KHNYN proteins, KHNYN-  
277 mutNEDD8-GFP and KHNYN $\Delta$ CUBAN-GFP stable cell lines were made. Similar to  
278 the transient transfection experiments described above (Figure 4B), deletion of the  
279 CUBAN domain decreased KHNYN-GFP antiviral activity while introducing the  
280 mutations that reduce NEDD8 binding did not affect it (Figure 4C and Figure S4B).  
281 Of note, the increase in KHNYN abundance due to the CUBAN domain deletion or  
282 mutations that decrease NEDD8 binding are less pronounced in the KHNYN-GFP  
283 cell lines than in the experiments with transiently transfected KHNYN-FLAG  
284 constructs, possibly because the GFP fusion stabilizes the wild-type protein.  
285 Interestingly, while KHNYN-mutNEDD8-GFP had a similar localization to the  
286 cytoplasm as wild-type KHNYN-GFP, KHNYN $\Delta$ CUBAN-GFP had a substantial  
287 increase in nuclear localization (Figure 4D). Therefore, the CUBAN domain regulates  
288 KHNYN subcellular localization in addition to its homeostatic turnover and antiviral  
289 activity.

290

291 **KHNYN has a nuclear export signal at the C-terminus of the CUBAN domain**  
292 **that is required for antiviral activity.**

293 CRM1 (also known as XPO1) is a nuclear export protein that mediates trafficking of  
294 a large number of cellular proteins and ribonucleoprotein complexes from the  
295 nucleus to the cytoplasm [54]. CRM1 binds leucine-rich nuclear export signals  
296 (NESs) in cargo proteins and KHNYN has previously been identified as a CRM1  
297 cargo in a large-scale proteomics screen [54, 55]. To confirm that KHNYN uses the  
298 CRM1 nuclear export pathway, we compared the subcellular localization of KHNYN-  
299 GFP, KHNYN-mutNEDD8-GFP and KHNYN $\Delta$ CUBAN-GFP in the absence and  
300 presence of leptomycin B, a small molecule inhibitor of CRM1 [56]. Addition of

301 leptomycin B to the KHNYN-GFP stable cell lines substantially increased wild-type  
302 KHNYN-GFP or KHNYN-mutNEDD8-GFP nuclear localization to levels similar to  
303 KHNYN $\Delta$ CUBAN-GFP (Figure 5). However, the subcellular localization of  
304 KHNYN $\Delta$ CUBAN-GFP was not affected by leptomycin B, supporting the observation  
305 that the functional NES for CRM1 is present in the CUBAN domain. ZAP-L and ZAP-  
306 S also have a CRM1 NES and ZAP-S has been reported to be a CRM1-dependent  
307 nucleocytoplasmic shuttling protein [55, 57]. However, ZAP was not re-localized to  
308 the nucleus by leptomycin B treatment (Figure 5), which may indicate that in these  
309 cells it is sequestered in the cytosol or at cytoplasmic membranes.

310

311 There are at least two types of CRM1 NESs with different spacing of the hydrophobic  
312 residues that fit into five pockets in CRM1: the Rev-type NES and the PKI-type NES  
313 [58]. To identify potential NESs in KHNYN, we used the Wregex tool [59], which  
314 identified a putative NES at the C-terminus of the CUBAN domain with hydrophobic  
315 residues fitting the PKI-type NES spacing (residues 669-678, LSEALLSLNF, amino  
316 acids predicted to bind CRM1 are underlined). Of note, this tool only identified  
317 positions 1-4 for the predicted CRM1 NES and did not identify the more recently  
318 identified position 0 [58, 59]. For a PKI-type NES, position 0 is two amino acids  
319 upstream of position 1 and is preferentially preceded by an acidic residue [58]. The  
320 C-terminal NES in KHNYN fits this consensus perfectly, with the full NES predicted  
321 to be DINQLSEALLSLNF and comprising the last 14 amino acids of the protein  
322 (Figure 6A). This sequence is located in the third helix of the CUBAN domain (Figure  
323 6B), which does not contain any of the residues that interact with NEDD8.

324

325 To test the functional role of the NES in KHNYN, we made stable cell lines  
326 expressing KHNYN $\Delta$ NES-GFP and KHNYN-NESmut-GFP. KHNYN-NESmut-GFP  
327 has all five amino acids predicted to directly bind CRM1 mutated to serine and, in  
328 KHNYN $\Delta$ NES-GFP, the entire 14 residue NES sequence was deleted (Figure 6A).  
329 KHNYN $\Delta$ NES-GFP does not show a similar increase in protein abundance as  
330 KHNYN $\Delta$ CUBAN-GFP and has similar expression levels as KHNYN-GFP (Figure  
331 6C), indicating that the homeostatic turnover mediated by the NEDD8 interaction is  
332 not affected by deleting the final 14 amino acids of the domain. It should be noted  
333 that the three-helix bundle of the CUBAN domain fold is not tightly packed and  
334 NEDD8 binding may not require the integrity of the fully folded domain [15]. Deleting  
335 or mutating the NES decreased KHNYN antiviral activity and increased its nuclear  
336 localization similar to KHNYN- $\Delta$ CUBAN (Figure 6C-D and Figure S5A). This  
337 suggests that the loss of antiviral activity for KHNYN $\Delta$ CUBAN is due to the deletion  
338 of the C-terminal NES in the CUBAN domain. This also shows that changes in  
339 KHNYN abundance can be separated from changes in its subcellular localization  
340 and antiviral activity. While deletion or mutation of the NES re-localizes KHNYN to  
341 the nucleus, it has no effect on ZAP or TRIM25 localization (Figure 6D and Figure  
342 S5B).

343  
344 Because we did not observe ZAP re-localization to the nucleus upon CRM1 inhibition  
345 by leptomycin B treatment or re-localization of KHNYN to the nucleus (Figure 4D,  
346 Figure 5 and Figure 6D), we hypothesized that the KHNYN NES could be required  
347 for antiviral activity by allowing it to interact with ZAP in the cytoplasm. ZAP-L has  
348 greater antiviral activity than ZAP-S against several viruses, including HIV-1<sub>CpG</sub> [32-  
349 35]. This is at least in part because it contains an S-farnesylation motif that localizes

350 it to the endomembrane system and is required for its antiviral activity [33-36]. To  
351 determine if the nuclear export signal in KHNYN is required for it to interact with  
352 ZAP, we performed co-immunoprecipitation experiments in the KHNYN-GFP and  
353 KHNYN $\Delta$ NES-GFP cell lines. Immunoprecipitation of KHNYN-GFP pulled down  
354 ZAP-L but no detectable ZAP-S (Figure 7A). Supporting this observation, we recently  
355 showed that immunoprecipitation of ZAP-L preferentially pulls down KHNYN  
356 compared to ZAP-S and mutation of the S-farnesylation motif decreases this  
357 interaction [35]. KHNYN $\Delta$ NES-GFP immunoprecipitated less ZAP-L than wild-type  
358 KHNYN (Figure 7A), which suggests that nuclear export of KHNYN is required for it  
359 to bind ZAP-L that is localized to the cytoplasmic endomembrane system.

360

361 ZAP and TRIM25 have previously been shown to have co-evolved [60] and we  
362 hypothesized that KHNYN might also have acquired adaptive changes to act as a  
363 ZAP cofactor. ZAP evolved in tetrapods from a PARP12 gene duplication [60]. While  
364 the N4BP1-KHNYN evolutionary pathway is currently unclear, N4BP1-like proteins  
365 are present outside of chordates such as in the crown-of-thorns starfish (*Acanthaster*  
366 *planci*). Within the phylum *Chordata*, N4BP1 proteins are found throughout the  
367 *Vertebrata* subphylum, including bony fish (class *Osteichthyes*) (Figure 7B and  
368 Figure S6). Clear KHNYN orthologs are also present in bony fish and are present in  
369 most tetrapods, including amphibians (class *Amphibia*), reptiles (class *Reptilia*) and  
370 mammals (class *Mammalia*). However, while N4BP1 orthologs are present in birds  
371 (class *Aves*), KHNYN orthologs are not, suggesting that it has been lost in this  
372 lineage. Interestingly, the evolution of the KHNYN NES appears to correlate with the  
373 evolution of ZAP in tetrapods. In bony fish, the C-terminus of KHNYN contains three  
374 hydrophobic amino acids in positions 0, 1 and 2 of the NES (Figure 7C). These are



375 also present in N4BP1 orthologs throughout vertebrates. However, for the  
376 amphibian, reptile and mammal classes with clear ZAP orthologs [60], hydrophobic  
377 residues are found in positions 3 and 4 of the NES and are conserved throughout  
378 these lineages (Figure 7C and Figure S6). Therefore, we hypothesize that the NES  
379 at the C-terminus of KHNYN co-evolved with the evolution of ZAP from PARP12 in  
380 the tetrapod lineage.

381

## 382 **DISCUSSION**

383 KHNYN has three primary domains: an N-terminal extended di-KH domain, a PIN  
384 domain and a C-terminal CUBAN domain. All three domains are necessary for its  
385 antiviral activity. The extended di-KH domain appears to be unique to the  
386 KHNYN/N4BP1/NYNRIN family and has diverged from previously characterized di-  
387 KH domains in RNA binding proteins. In KHNYN, the GxxG motif required for RNA  
388 binding is not present in KH1. Furthermore, the di-KH domain is extended by the  
389 packing of three additional alpha helices at the C-terminus of KH2, forming what may  
390 be a functional module. While the extended di-KH domain is required for full antiviral  
391 activity, our data shows that it does not appear to stably bind RNA since there was  
392 no detectable crosslinking of KHNYN to cellular RNA and it does not modulate ZAP  
393 binding to CpG-enriched HIV-1 RNA. KH domains in the Rrp40 or GLD-3 proteins do  
394 not bind RNA and instead have been shown to mediate protein-protein interactions  
395 [47, 48]. This is a potential function for the extended di-KH domain in KHNYN. Of  
396 note, the ZAP interaction region in KHNYN identified through a yeast-two-hybrid  
397 screen consists of the C-terminal portion of the PIN domain plus the CUBAN domain,  
398 so the extended di-KH domain likely does not mediate the ZAP-KHNYN interaction

399 [12]. However, it could regulate the binding of other, currently unidentified, ZAP  
400 cofactors.

401

402 The low abundance of KHNYN appears to be at least partly due to its CUBAN  
403 domain, which mediates an interaction with neddylated cullin-RING E3 ubiquitin  
404 ligases [15]. Mutation of the residues in this domain that bind NEDD8 lead to a  
405 substantial increase in KHNYN abundance, though this does not affect its antiviral  
406 activity. KHNYN protein levels could be tightly regulated to prevent off-target  
407 endoribonuclease activity, which would be determinantal to cellular gene expression,  
408 thus necessitating turnover by cullin-RING E3 ubiquitin ligases. In HeLa cells, ZAP is  
409 expressed at much higher levels than KHNYN [51]. This appears to make it limiting  
410 for ZAP antiviral activity because KHNYN overexpression potently promotes  
411 restriction of CpG-enriched HIV-1 [12]. In addition, KHNYN could have additional  
412 cellular functions beyond being a ZAP cofactor since KHNYN orthologs are present  
413 in bony fish that do not have clear ZAP orthologs.

414

415 It remains unclear how the ZAP antiviral complex is assembled on a ZAP-response  
416 element in viral RNA to inhibit gene expression [1]. While CLIP-seq experiments  
417 have shown that ZAP binds at least transiently to several CpG sites in wild-type HIV-  
418 1, this does not correlate with substantial antiviral activity [3, 28, 60]. Instead, a  
419 substantial number of CpG dinucleotides appear to have to be clustered together,  
420 possibly with specific context preferences such as CpG spacing, flanking nucleotide  
421 composition and local RNA structure, to allow ZAP to target HIV-1 RNA for  
422 degradation and restrict viral replication [28-30]. Several lines of evidence support  
423 that ZAP mediates KHNYN targeting to viral RNA. First, KHNYN is not required for

424 ZAP to bind CpG-enriched HIV-1 RNA. Second, when ZAP is depleted, KHNYN  
425 loses its antiviral activity [12]. Third, HIV-1 with CpGs introduced in different regions  
426 of the genome have differential sensitivity to ZAP and this correlates with KHNYN  
427 antiviral activity [29]. Therefore, we propose that ZAP and KHNYN interact to form a  
428 complex in which ZAP provides the RNA targeting module and KHNYN cleaves the  
429 target RNA through its PIN domain, which we have previously shown to be required  
430 for antiviral activity [12]. TRIM25 appears to regulate ZAP binding to target HIV-1  
431 RNA and therefore the presence of TRIM25 binding sites may also be important to  
432 define ZAP-response elements.

433

434 ZAP subcellular localization appears to regulate its antiviral activity against several  
435 viruses in that ZAP-L with an intact S-farnesylation motif mediates more potent  
436 restriction than ZAP-S [32-35]. This correlates with preferential KHNYN and TRIM25  
437 binding to ZAP-L compared to ZAP-S, even though the binding sites for KHNYN and  
438 TRIM25 are present in both isoforms [9, 12, 35, 60]. KHNYN subcellular localization  
439 also appears to be important in that the CRM1 nuclear export signal is required for  
440 full antiviral activity. How KHNYN is targeted to the nucleus is not clear and we have  
441 not identified a canonical nuclear localization signal (NLS) in it. However, KHNYN  
442 could be trafficked into the nucleus by interacting with other proteins that contain an  
443 NLS. Where KHNYN first interacts with ZAP is also not known and ZAP-L  
444 localization may be dynamic. One possibility is that cytoplasmic ZAP-L molecules  
445 bind KHNYN before or after localization to the endomembrane system but prior to  
446 binding RNA, leading to a pre-formed antiviral complex. However, the limiting  
447 abundance of KHNYN implies that only a small pool of ZAP molecules would be  
448 bound to KHNYN. Another possibility is that KHNYN cycles through the nucleus and

449 cytoplasm and only interacts with ZAP after it binds RNA, which would act as a  
450 regulatory mechanism to allow endonucleolytic cleavage only for RNAs that have  
451 ZAP bound to them with a particular stoichiometry or structure. Therefore, in addition  
452 to its low abundance, nuclear localization of KHNYN could regulate its activity by  
453 preventing it from interacting with ZAP bound RNAs that are not bona fide targets.  
454 Future experiments to define the molecular characteristics and subcellular  
455 localization of the ZAP-KHNYN antiviral complex in a living cell will be required to  
456 fully understand how ZAP inhibits viral gene expression.

457

## 458 **MATERIALS AND METHODS**

### 459 **Plasmids and Cell lines**

460 HeLa, HEK293T and TZM-bl cells were maintained in high glucose DMEM  
461 supplemented with GlutaMAX (Thermo Fisher Scientific), 10% fetal bovine serum,  
462 100 U/mL penicillin and 100 mg/mL streptomycin and incubated with 5% CO<sub>2</sub> at  
463 37°C. Control CRISPR, KHNYN CRISPR and TRIM25 CRISPR HeLa cells were  
464 previously described [12]. The CRISPR-resistant pKHNYN-FLAG plasmid has been  
465 previously described [12] and specific mutations were cloned into it using site-  
466 specific mutagenesis. All primers (Supplementary Table 2) were purchased from  
467 Eurofins Genomics and all PCR reactions were performed using Q5 High-Fidelity  
468 (New England Biolabs). HIV-1<sub>NL4-3</sub> (pHIV-1<sub>WT</sub>) and HIV<sub>env</sub><sub>86-561</sub>CpG (pHIV-1<sub>CpG</sub>) in  
469 pGL4 were previously described [12, 61]. CRISPR-resistant KHNYN-GFP constructs  
470 were made using a flexible "GGGGSGGGSGGGG" linker between KHNYN and  
471 GFP. Stable CRISPR KHNYN HeLa cells expressing CRISPR-resistant KHNYN-  
472 GFP, KHNYNmutNEDD8-GFP, KHNYNΔCUBAN-GFP, KHNYNΔNES-GFP and  
473 KHNYN-NESmut-GFP were produced by transduction with the murine leukemia

474 virus (MLV) retroviral vector MIGR1 with the KHNYN-GFP construct cloned into the  
475 multiple cloning site and GFP replaced by the Blastidicin S-resistance gene [62].

476

### 477 **Transfections and infections**

478 HeLa cells were seeded in 24-well plates at 70% confluency. Cells were transfected  
479 according to the manufacturer's instructions using TransIT-LT1 (Mirus) at the ratio of  
480 3  $\mu$ L TransIT- LT1 to 1  $\mu$ g DNA. For the HIV experiments, 0.5  $\mu$ g pHIV<sub>WT</sub> or pHIV<sub>CpG</sub>  
481 and the designated amount of KHNYN-FLAG or GFP-FLAG for a total of 1  $\mu$ g DNA  
482 were transfected. 24 hours post-transfection, the culture media was replaced with  
483 fresh media. For HIV-1<sub>WT</sub> or HIV-1<sub>CpG</sub> infection of HeLa cells, viral stocks were  
484 produced by co-transfecting pHIV-1<sub>WT</sub> or pHIV-1<sub>CpG</sub> with pVSV-G [63] into HEK293T  
485 ZAP CRISPR cells [29] and titred on TZM-bl cells.

486

### 487 **Analysis of protein expression by immunoblotting**

488 48 hours post-transfection, the HeLa cells were lysed in Laemmli buffer at 95°C for  
489 10 minutes. The culture supernatant was filtered through a 0.45  $\mu$ M filter and virions  
490 were pelleted by centrifugation for 2 hours at 20,000 x g through a 20% sucrose  
491 cushion in phosphate-buffered saline (PBS). Viral pellets were resuspended in 2X  
492 Laemmli buffer. Cell lysates and virion lysates were resolved on 8 to 16% Mini-  
493 Protean TGX precast gels (Bio-Rad), transferred onto nitrocellulose membranes (GE  
494 Healthcare) and blocked in 5% non-fat milk in PBS with 0.1% Tween 20. Primary  
495 antibodies were incubated overnight at 4°C followed by 3 washes with 1X PBS and  
496 the corresponding secondary antibody was incubated for one hour. Proteins were  
497 visualized by LI-COR (Odyssey Fc) measuring secondary antibody fluorescence or  
498 using Amersham ECL Prime Western Blotting Detection reagent (GE Lifesciences)

499 for HRP-linked antibodies with an ImageQuant (LAS8000 Mini). Primary and  
500 secondary antibodies used in this study: 1:50 HIV anti-p24Gag [64] (Mouse), 1:3000  
501 anti-HIV gp160/120 (Rabbit, ADP421; Centralized Facility for AIDS Reagents  
502 (CFAR), 1:5000 anti-HSP90 (Rabbit, GeneTex, GTX109753), 1:1000 anti-FLAG  
503 (DYKDDDDK, Rabbit, Cell Signaling, 14793), 1:2000 anti- $\beta$ -actin (Mouse, Abcam;  
504 Ab6276), 1:5000 anti-ZAP (Rabbit, Abcam, ab154680), 1:1000 anti-GFP (Mouse.  
505 Roche 11814460001), 1:5000 anti-rabbit HRP (Cell Signaling Technology, 7074),  
506 1:5000 anti-mouse HRP (Cell Signaling Technology, 7076), 1:5000 anti-mouse  
507 IRDye 680RD (LI-COR, 926–68070), 1:5000 anti-rabbit IRDye 800CW (LI-COR,  
508 926–32211).

509

#### 510 **TZM-bl infectivity assay**

511 The TZM-bl indicator cell line was used to quantify the amount of infectious virus [65-  
512 67]. Briefly, cells were seeded in 24-well plates and infected by incubation with virus  
513 stocks. 48 hours post-infection, the cells were lysed and infectivity was measured by  
514  $\beta$ -galactosidase expression using the Galacto-Star System following manufacturer's  
515 instructions (Applied Biosystems).  $\beta$ -galactosidase activity was quantified as relative  
516 light units per second using a PerkinElmer Luminometer.

517

#### 518 **Immunoprecipitation assays**

519 For the UV crosslinking, immunoprecipitation and  $\gamma^{32}\text{P}$ -ATP RNA labelling assay,  
520 KHNYN CRISPR HeLa cells stably expressing GFP or GFP-KHNYN were seeded in  
521 10cm dishes 24 hours prior to UV crosslinking. Dynabeads protein G beads  
522 (ThermoFisher Scientific) were washed twice with lysis buffer (50 mM Tris-HCl, pH  
523 7.4, 100 mM NaCl, 1% Igepal CA-630, 0.1% SDS, 0.5% sodium deoxycholate and

524 protease inhibitor cocktail) and incubated with 5 µg anti-ZAP (Abcam, ab154680)  
525 antibody for 1 hour at 4°C. The cells were washed with cold 1X PBS, UV-crosslinked  
526 at 400 mJ/cm<sup>2</sup> and collected by scraping. DNA was sheared with the Bioruptor Pico  
527 (Diagenode, B01060010) for 30 seconds on/off five times. The samples were then  
528 incubated with 4U of DNase Turbo (Invitrogen AM2238) and 2,5 U/mL of RNase I  
529 (Invitrogen, EN0602) for 5 minutes at 37°C with shaking (1100 rpm). Lysates were  
530 then centrifuged for 10 minutes at 15000xg and loaded on the antibody-conjugated  
531 beads overnight. The following day, the samples were washed twice with high-salt  
532 buffer (50 mM Tris-HCl, pH 7.4, 1M NaCl, 1% Igepal CA-630, 0.1% SDS, 0.5%  
533 sodium deoxycholate and protease inhibitor cocktail) and once with 1X FastAP buffer  
534 (10 mM Tris-HCl (pH 8.0 at 37 °C), 5mM MgCl<sub>2</sub>, 0.1M KCl, 0.02% Triton X-100 and  
535 0.1 mg/mL BSA), prior to incubation with 0.5U of FastAP (Invitrogen, EF0654) for 40  
536 minutes at 37°C and 1100 rpm shaking. Following FastAP digestion, the samples  
537 were washed twice with high-salt wash buffer and once with 1X PNK buffer (7 mM  
538 Tris-HCl pH 7.6, 1 mM MgCl<sub>2</sub>, 0.5 mM dithiothreitol), followed by RNA labelling with  
539  $\gamma^{32}\text{P}$ -ATP during 60 minutes at 37°C and 1100 rpm shaking. The radiolabeled beads  
540 were pelleted and suspended in 2X Laemmli buffer, incubated for 10 minutes at  
541 70°C and then loaded into a 4-12% NuPAGE Bis-Tris gel (Invitrogen, NP0326BOX).  
542 After electrophoresis, the gel was transferred to a nitrocellulose membrane and  
543 visualized using a Typhoon TRIO.

544

545 For the UV crosslinking, immunoprecipitation and quantitative RT-PCR assays,  
546 control CRISPR, TRIM25 CRISPR and KHNYN CRISPR HeLa cells were plated in  
547 6-well plates and transfected using TransIT-LT1 transfection reagent with 500ng of  
548 pcDNA3.1-GFP or pcDNA3.1-ZAP-L plus 500ng of pHIV-1WT or pHIV-1CpG. The

549 media was changed 4-6 hours later. 48 hours post-transfection, the cells were  
550 washed with 1X PBS prior to 'on-dish' irradiation with 400mJ/cm<sup>2</sup> using a UV  
551 Stralinker 2400. Cells were then pelleted and lysed with RIPA buffer containing  
552 50mM Tris-HCl (pH 7.4), 150mM NaCl, 0.1% SDS, 0.5% sodium deoxycholate, 1%  
553 NP-40 and protease inhibitors (Roche), and then sonicated. Cleared lysates were  
554 immunoprecipitated overnight at 4°C with a rabbit anti-ZAP antibody (Abcam) and  
555 protein G beads (Thermo Fisher). Following three washes with RIPA buffer, beads  
556 were resuspended in 100µl of RIPA and boiled for 10 minutes to decouple  
557 protein/RNA complexes from the beads. Finally, input and pulldown samples were  
558 incubated with proteinase K (Thermo Fisher, 2mg/ml) for 1 hour at 37°C, and then  
559 boiled for 10 minutes to inactivate the enzyme. Samples were stored at -20°C for  
560 downstream RNA extraction and RT-qPCR analysis. RNA was isolated and purified  
561 from the lysates by first resuspending the input and pulldown samples in QIAzol  
562 (QIAGEN). The suspension was passed through QIAshredder columns (QIAGEN)  
563 for homogenization, and then transferred to phase lock gel tubes (VWR) prior to  
564 addition of chloroform (SIGMA). After manually shaking the tubes, samples were  
565 centrifuged full speed, for 15 minutes at 4°C. The aqueous phase was passed to a  
566 new tube, and isopropanol added. After 10 minutes at room temperature, tubes were  
567 centrifuged as before, and supernatants removed. RNA pellets were subsequently  
568 washed with 75% ethanol, and centrifuged at 7500 x g, for 5 minutes at 4°C.  
569 Following aspiration of the supernatants, the RNA pellets were left to dry and then  
570 resuspended in RNase-free water. Purified RNAs were reverse transcribed by  
571 random hexamer primers using a High-Capacity cDNA Reverse Transcription kit  
572 (Applied Biosystems), according to the manufacturer instructions. Of the final  
573 reaction, 5µl were used for quantitative PCR with primer/probe sets for human



574 GAPDH (Applied Biosystems Cat# Hs99999905\_m1) and HIV-1 genomic RNA  
575 (primers GGCCAGGGAATTTTCTTCAGA / TTGTCTCTTCCCCAACCTGA  
576 (forward/reverse) and probe FAM-ACCAGAGCCAACAGCCCCACCAGA-TAMRA).  
577 Serial dilutions of HIV-1WT proviral DNA were used for standard curves to quantify  
578 HIV-1 RNA copies.

579

580 For the assays analyzing KHNYN-GFP co-immunoprecipitation with ZAP, HeLa cells  
581 stably expressing wild-type KHNYN-GFP wild-type or mutant versions were seeded  
582 in 6-well plates for 24 hours prior to immunoprecipitation. The cells were lysed on ice  
583 in lysis buffer (0.5% NP-40, 150 mM KCl, 10 mM HEPES pH 7.5, 3 mM MgCl<sub>2</sub>)  
584 supplemented with complete Protease inhibitor cocktail tablets (Sigma-Aldrich). The  
585 lysates were incubated on ice for 1 hour and centrifugated at 20,000 x g for 15  
586 minutes at 4°C. 50 µl of the post-nuclear supernatant was saved as the input lysate  
587 and 450 µL was incubated with 5µg of anti-GFP antibody (Roche 11814460001) for  
588 1 hour at 4°C. Protein G Dynabeads (Invitrogen) were then added and incubated  
589 overnight at 4°C with rotation. The lysates were washed four times with wash buffer  
590 (0.05% NP-40, 150 mM KCl, 10 mM HEPES pH 7.5, 3 mM MgCl<sub>2</sub>) before the bound  
591 proteins were eluted with 2X Laemmli buffer and boiled for 10 minutes. Protein  
592 expression was analyzed by western blotting as described above.

593

#### 594 **Microscopy**

595 HeLa cells were seeded on 24-well plates on coverslips pre-treated with poly-lysine.  
596 KHNYN CRISPR HeLa cells were transfected with 250ng of CRISPR-resistant  
597 KHNYN-FLAG, ΔKH-KHNYN-FLAG or GDDG-KHNYN-FLAG. 24 hours post-  
598 transfection, the cells were fixed with 4% paraformaldehyde for 20 minutes at room

599 temperature, washed once with 1X PBS and once in 10mM glycine. Cells were then  
600 permeabilized for 15 minutes in 1% BSA and 0.1% Triton-X in PBS. HeLa cells  
601 stably expressing wild-type KHNYN-GFP or versions with specific mutations were  
602 seeded in pre-treated 24-well plates 24 hours prior to immunostaining and were fixed  
603 and permeabilized as above. Mouse anti-FLAG (1:500), rabbit anti-ZAP (1:500) or  
604 rabbit anti-TRIM25 (1:500) antibodies were diluted in 1X PBS/0.01% Triton-X and  
605 the cells were stained for 1 hour at room temperature. The cells were then washed  
606 three times in PBS/0.01% Triton-X and incubated with Alexa Fluor 594 anti-mouse or  
607 Alexa Fluor 647 anti-rabbit (Molecular Probes, 1:500 in 1X PBS/0.01% Triton-X) for  
608 45 minutes in the dark. Finally, the coverslips were washed three times with 1X  
609 PBS/0.01% Triton-X and then mounted on slides using Prolong Diamond Antifade  
610 Mountant with DAPI (Invitrogen). Imaging was performed on a Nikon Eclipse Ti  
611 Inverted Microscope, equipped with a Yokogawa CSU/X1-spinning disk unit, under  
612 100x objective and laser wavelengths of 405 nm, 488 nm, 561 nm, and 640 nm.  
613 Image processing and co-localization analysis was performed with Image J (Fiji)  
614 software.

615

616 For the Leptomycin B treatment experiments, HeLa cells stably expressing KHNYN-  
617 GFP wild-type or mutants were seeded in pre-treated 24-well plates 24 hours prior to  
618 4 hour treatment with 50nM of Leptomycin B or DMSO at 37°C. After treatment, the  
619 cells were fixed and immunostained as described above.

620

621 **KHNYN domain prediction, KH domain alignment, NES identification and**  
622 **phylogenetic analysis of KHNYN and N4BP1**

623 Phyre2 was used on the full-length KHNYN sequence (NP\_056114) using the  
624 intensive modelling mode [37]. KH domains were aligned using MUSCLE [68]  
625 implemented in the DNA STAR suite of programs. The NES was identified using the  
626 Wregex tool with the NES/CRM1 motif and the relaxed configuration [59]. Amino acid  
627 sequences for KHNYN and N4BP1 were obtained from NCBI Gene, checked manually  
628 to ensure they were full-length sequences and aligned using ClustalOmega. The  
629 resulting alignment file was used to infer a maximum likelihood tree in the DIVEIN web  
630 server [69] using the LG substitution model, and the N4BP1-like sequences from the  
631 Californian sea hare (*Aplysia californica*), and the Crown-of-thorns Starfish  
632 (*Acanthaster planci*) as outgroups. The resulting tree was visually presented and  
633 annotated using the interactive Tree of life (iTol) [70].

634

### 635 **Statistical analysis**

636 Statistical significance was determined using unpaired two-tailed *t*-tests in GraphPad.  
637 Data are represented as mean  $\pm$  standard deviation and significance was ascribed to  
638 p values  $p < 0.05$ .

639

### 640 **ACKNOWLEDGEMENTS**

641 We thank members of the Neil and Swanson laboratories as well as Michael Malim for  
642 helpful discussions. The following reagents were obtained through the NIH AIDS  
643 Research and Reference Reagent Program, Division of AIDS, NIAID, NIH: TZM-bl  
644 from Dr. John C. Kappes, Dr. Xiaoyun Wu and Tranzyme Inc; HIV-1 p24 Hybridoma  
645 (183-H12-5C) from Dr. Bruce Chesebro. The Antiserum to HIV-1 gp120 #20 (ARP421)  
646 was obtained from the NIBSC Centre for AIDS Reagents. These studies were funded  
647 by a Medical Research Council grant MR/S000844/1 to SJDN and CMS, a Deutsche

648 Forschungsgemeinschaft (German Research Foundation) fellowship to DK (Project  
649 number: KM 5/1-1), a Wellcome Trust Senior Research Fellowship (WT098049AIA) to  
650 SJDN, a Royal Society/Wellcome Trust Sir Henry Dale Fellowship (206200/Z/17/Z) to  
651 CO and the Francis Crick Institute, which receives its core funding from Cancer  
652 Research UK (FC001178), the UK Medical Research Council (FC001178) and the  
653 Wellcome Trust (FC001178). MF is supported by the UK Medical Research Council  
654 (MR/R50225X/1) and is a King's College London member of the MRC Doctoral  
655 Training Partnership in Biomedical Sciences. This work was supported by the  
656 Department of Health via a National Institute for Health Research Comprehensive  
657 Biomedical Research Centre award to Guy's and St. Thomas' NHS Foundation Trust  
658 in partnership with King's College London and King's College Hospital NHS  
659 Foundation Trust.

660

## 661 **COMPETING INTERESTS**

662 The authors declare no competing interests.

663

## 664 **REFERENCES**

- 665 1. Ficarelli M, Neil SJD, Swanson CM. Targeted Restriction of Viral Gene Expression and  
666 Replication by the ZAP Antiviral System. *Annu Rev Virol.* 2021;8(1):265-83. Epub  
667 2021/06/16. doi: 10.1146/annurev-virology-091919-104213. PubMed PMID: 34129371.
- 668 2. Hur S. Double-Stranded RNA Sensors and Modulators in Innate Immunity. *Annual*  
669 *review of immunology.* 2019;37:349-75. Epub 2019/01/24. doi: 10.1146/annurev-immunol-  
670 042718-041356. PubMed PMID: 30673536; PubMed Central PMCID: PMC7136661.
- 671 3. Meagher JL, Takata M, Goncalves-Carneiro D, Keane SC, Rebendenne A, Ong H, et al.  
672 Structure of the zinc-finger antiviral protein in complex with RNA reveals a mechanism for  
673 selective targeting of CG-rich viral sequences. *Proc Natl Acad Sci U S A.* 2019;116(48):24303-  
674 9. Epub 2019/11/14. doi: 10.1073/pnas.1913232116. PubMed PMID: 31719195; PubMed  
675 Central PMCID: PMC6883784.
- 676 4. Luo X, Wang X, Gao Y, Zhu J, Liu S, Gao G, et al. Molecular Mechanism of RNA  
677 Recognition by Zinc-Finger Antiviral Protein. *Cell reports.* 2020;30(1):46-52 e4. Epub  
678 2020/01/09. doi: 10.1016/j.celrep.2019.11.116. PubMed PMID: 31914396.

- 679 5. Greenbaum BD, Rabadan R, Levine AJ. Patterns of oligonucleotide sequences in viral  
680 and host cell RNA identify mediators of the host innate immune system. *PLoS One*.  
681 2009;4(6):e5969. Epub 2009/06/19. doi: 10.1371/journal.pone.0005969. PubMed PMID:  
682 19536338; PubMed Central PMCID: PMCPMC2694999.
- 683 6. Tulloch F, Atkinson NJ, Evans DJ, Ryan MD, Simmonds P. RNA virus attenuation by  
684 codon pair deoptimisation is an artefact of increases in CpG/UpA dinucleotide frequencies.  
685 *Elife*. 2014;3:e04531. Epub 2014/12/10. doi: 10.7554/eLife.04531. PubMed PMID:  
686 25490153; PubMed Central PMCID: PMCPMC4383024.
- 687 7. Guo X, Ma J, Sun J, Gao G. The zinc-finger antiviral protein recruits the RNA  
688 processing exosome to degrade the target mRNA. *Proc Natl Acad Sci U S A*.  
689 2007;104(1):151-6. Epub 2006/12/23. doi: 10.1073/pnas.0607063104. PubMed PMID:  
690 17185417; PubMed Central PMCID: PMCPMC1765426.
- 691 8. Zhu Y, Chen G, Lv F, Wang X, Ji X, Xu Y, et al. Zinc-finger antiviral protein inhibits HIV-  
692 1 infection by selectively targeting multiply spliced viral mRNAs for degradation. *Proc Natl*  
693 *Acad Sci U S A*. 2011;108(38):15834-9. Epub 2011/08/31. doi: 10.1073/pnas.1101676108.  
694 PubMed PMID: 21876179; PubMed Central PMCID: PMCPMC3179061.
- 695 9. Li MM, Lau Z, Cheung P, Aguilar EG, Schneider WM, Bozzacco L, et al. TRIM25  
696 Enhances the Antiviral Action of Zinc-Finger Antiviral Protein (ZAP). *PLoS Pathog*.  
697 2017;13(1):e1006145. Epub 2017/01/07. doi: 10.1371/journal.ppat.1006145. PubMed  
698 PMID: 28060952; PubMed Central PMCID: PMCPMC5245905.
- 699 10. Zheng X, Wang X, Tu F, Wang Q, Fan Z, Gao G. TRIM25 Is Required for the Antiviral  
700 Activity of Zinc Finger Antiviral Protein. *J Virol*. 2017;91(9):e00088-17. Epub 2017/02/17.  
701 doi: 10.1128/JVI.00088-17. PubMed PMID: 28202764; PubMed Central PMCID:  
702 PMCPMC5391446.
- 703 11. Zhu Y, Wang X, Goff SP, Gao G. Translational repression precedes and is required for  
704 ZAP-mediated mRNA decay. *EMBO J*. 2012;31(21):4236-46. Epub 2012/10/02. doi:  
705 10.1038/emboj.2012.271. PubMed PMID: 23023399; PubMed Central PMCID:  
706 PMCPMC3492732.
- 707 12. Ficarelli M, Wilson H, Pedro Galao R, Mazzon M, Antzin-Anduetza I, Marsh M, et al.  
708 KHNYN is essential for the zinc finger antiviral protein (ZAP) to restrict HIV-1 containing  
709 clustered CpG dinucleotides. *Elife*. 2019;8:e46767. Epub 2019/07/10. doi:  
710 10.7554/eLife.46767. PubMed PMID: 31284899; PubMed Central PMCID: PMCPMC6615859.
- 711 13. Anantharaman V, Aravind L. The NYN domains: novel predicted RNAses with a PIN  
712 domain-like fold. *RNA Biol*. 2006;3(1):18-27. Epub 2006/11/23. doi: 10.4161/rna.3.1.2548.  
713 PubMed PMID: 17114934.
- 714 14. Matelska D, Steczkiewicz K, Ginalski K. Comprehensive classification of the PIN  
715 domain-like superfamily. *Nucleic Acids Res*. 2017;45(12):6995-7020. Epub 2017/06/03. doi:  
716 10.1093/nar/gkx494. PubMed PMID: 28575517; PubMed Central PMCID: PMCPMC5499597.
- 717 15. Castagnoli L, Mandaliti W, Nepravishita R, Valentini E, Mattioni A, Procopio R, et al.  
718 Selectivity of the CUBAN domain in the recognition of ubiquitin and NEDD8. *FEBS J*.  
719 2019;286(4):653-77. Epub 2019/01/20. doi: 10.1111/febs.14752. PubMed PMID: 30659753.
- 720 16. Marco A, Marin I. CGIN1: a retroviral contribution to mammalian genomes. *Mol Biol*  
721 *Evol*. 2009;26(10):2167-70. Epub 2009/06/30. doi: 10.1093/molbev/msp127. PubMed PMID:  
722 19561090.
- 723 17. Shaw AE, Hughes J, Gu Q, Behdenna A, Singer JB, Dennis T, et al. Fundamental  
724 properties of the mammalian innate immune system revealed by multispecies comparison  
725 of type I interferon responses. *PLoS Biol*. 2017;15(12):e2004086. Epub 2017/12/19. doi:

- 726 10.1371/journal.pbio.2004086. PubMed PMID: 29253856; PubMed Central PMCID:  
727 PMCPMC5747502.
- 728 18. Nepravishita R, Ferrentino F, Mandaliti W, Mattioni A, Weber J, Polo S, et al. CoCUN,  
729 a Novel Ubiquitin Binding Domain Identified in N4BP1. *Biomolecules*. 2019;9(7). Epub  
730 2019/07/20. doi: 10.3390/biom9070284. PubMed PMID: 31319543; PubMed Central  
731 PMCID: PMCPMC6681339.
- 732 19. Murillas R, Simms KS, Hatakeyama S, Weissman AM, Kuehn MR. Identification of  
733 developmentally expressed proteins that functionally interact with Nedd4 ubiquitin ligase. *J*  
734 *Biol Chem*. 2002;277(4):2897-907. Epub 2001/11/22. doi: 10.1074/jbc.M110047200.  
735 PubMed PMID: 11717310.
- 736 20. Sharma P, Murillas R, Zhang H, Kuehn MR. N4BP1 is a newly identified nucleolar  
737 protein that undergoes SUMO-regulated polyubiquitylation and proteasomal turnover at  
738 promyelocytic leukemia nuclear bodies. *J Cell Sci*. 2010;123(Pt 8):1227-34. Epub  
739 2010/03/18. doi: 10.1242/jcs.060160. PubMed PMID: 20233849; PubMed Central PMCID:  
740 PMCPMC2848111.
- 741 21. Oberst A, Malatesta M, Aqeilan RI, Rossi M, Salomoni P, Murillas R, et al. The Nedd4-  
742 binding partner 1 (N4BP1) protein is an inhibitor of the E3 ligase Itch. *Proc Natl Acad Sci U S*  
743 *A*. 2007;104(27):11280-5. Epub 2007/06/27. doi: 10.1073/pnas.0701773104. PubMed PMID:  
744 17592138; PubMed Central PMCID: PMCPMC2040890.
- 745 22. Yamasoba D, Sato K, Ichinose T, Imamura T, Koepke L, Joas S, et al. N4BP1 restricts  
746 HIV-1 and its inactivation by MALT1 promotes viral reactivation. *Nat Microbiol*.  
747 2019;4(9):1532-44. Epub 2019/05/28. doi: 10.1038/s41564-019-0460-3. PubMed PMID:  
748 31133753.
- 749 23. Gitlin AD, Heger K, Schubert AF, Reja R, Yan D, Pham VC, et al. Integration of innate  
750 immune signalling by caspase-8 cleavage of N4BP1. *Nature*. 2020;587(7833):275-80. Epub  
751 2020/09/25. doi: 10.1038/s41586-020-2796-5. PubMed PMID: 32971525.
- 752 24. Shi H, Sun L, Wang Y, Liu A, Zhan X, Li X, et al. N4BP1 negatively regulates NF-kappaB  
753 by binding and inhibiting NEMO oligomerization. *Nature communications*. 2021;12(1):1379.  
754 Epub 2021/03/04. doi: 10.1038/s41467-021-21711-5. PubMed PMID: 33654074; PubMed  
755 Central PMCID: PMCPMC7925594.
- 756 25. OhAinle M, Helms L, Vermeire J, Roesch F, Humes D, Basom R, et al. A virus-  
757 packageable CRISPR screen identifies host factors mediating interferon inhibition of HIV.  
758 *Elife*. 2018;7:e39823. Epub 2018/12/07. doi: 10.7554/eLife.39823. PubMed PMID:  
759 30520725; PubMed Central PMCID: PMCPMC6286125.
- 760 26. Kypr J, Mrazek J, Reich J. Nucleotide composition bias and CpG dinucleotide content  
761 in the genomes of HIV and HTLV 1/2. *Biochim Biophys Acta*. 1989;1009(3):280-2. Epub  
762 1989/12/22. doi: 10.1016/0167-4781(89)90114-0. PubMed PMID: 2597678.
- 763 27. Shpaer EG, Mullins JI. Selection against CpG dinucleotides in lentiviral genes: a  
764 possible role of methylation in regulation of viral expression. *Nucleic Acids Res*.  
765 1990;18(19):5793-7. Epub 1990/10/11. doi: 10.1093/nar/18.19.5793. PubMed PMID:  
766 2170945; PubMed Central PMCID: PMCPMC332316.
- 767 28. Takata MA, Goncalves-Carneiro D, Zang TM, Soll SJ, York A, Blanco-Melo D, et al. CG  
768 dinucleotide suppression enables antiviral defence targeting non-self RNA. *Nature*.  
769 2017;550(7674):124-7. Epub 2017/09/28. doi: 10.1038/nature24039. PubMed PMID:  
770 28953888; PubMed Central PMCID: PMCPMC6592701.
- 771 29. Ficarelli M, Antzin-Anduetza I, Hugh-White R, Firth AE, Sertkaya H, Wilson H, et al.  
772 CpG Dinucleotides Inhibit HIV-1 Replication through Zinc Finger Antiviral Protein (ZAP)-



- 773 Dependent and -Independent Mechanisms. *J Virol.* 2020;94(6):e01337-19. Epub  
774 2019/11/22. doi: 10.1128/JVI.01337-19. PubMed PMID: 31748389; PubMed Central PMCID:  
775 PMCPMC7158733.
- 776 30. Kmiec D, Nchioua R, Sherrill-Mix S, Sturzel CM, Heusinger E, Braun E, et al. CpG  
777 Frequency in the 5' Third of the env Gene Determines Sensitivity of Primary HIV-1 Strains to  
778 the Zinc-Finger Antiviral Protein. *mBio.* 2020;11(1):e02903-19. Epub 2020/01/16. doi:  
779 10.1128/mBio.02903-19. PubMed PMID: 31937644; PubMed Central PMCID:  
780 PMCPMC6960287.
- 781 31. Gao G, Guo X, Goff SP. Inhibition of retroviral RNA production by ZAP, a CCCH-type  
782 zinc finger protein. *Science.* 2002;297(5587):1703-6. Epub 2002/09/07. doi:  
783 10.1126/science.1074276. PubMed PMID: 12215647.
- 784 32. Kerns JA, Emerman M, Malik HS. Positive selection and increased antiviral activity  
785 associated with the PARP-containing isoform of human zinc-finger antiviral protein. *PLoS*  
786 *genetics.* 2008;4(1):e21. Epub 2008/01/30. doi: 10.1371/journal.pgen.0040021. PubMed  
787 PMID: 18225958; PubMed Central PMCID: PMCPMC2213710.
- 788 33. Charron G, Li MM, MacDonald MR, Hang HC. Prenylome profiling reveals S-  
789 farnesylation is crucial for membrane targeting and antiviral activity of ZAP long-isoform.  
790 *Proc Natl Acad Sci U S A.* 2013;110(27):11085-90. Epub 2013/06/19. doi:  
791 10.1073/pnas.1302564110. PubMed PMID: 23776219; PubMed Central PMCID:  
792 PMCPMC3703996.
- 793 34. Schwerk J, Soveg FW, Ryan AP, Thomas KR, Hatfield LD, Ozarkar S, et al. RNA-binding  
794 protein isoforms ZAP-S and ZAP-L have distinct antiviral and immune resolution functions.  
795 *Nat Immunol.* 2019;20(12):1610-20. Epub 2019/11/20. doi: 10.1038/s41590-019-0527-6.  
796 PubMed PMID: 31740798; PubMed Central PMCID: PMCPMC7240801.
- 797 35. Kmiec D, Lista MJ, Ficarella M, Swanson CM, Neil SJD. S-farnesylation is essential for  
798 antiviral activity of the long ZAP isoform against RNA viruses with diverse replication  
799 strategies. *PLoS Pathog.* 2021;17(10):e1009726. Epub 2021/10/26. doi:  
800 10.1371/journal.ppat.1009726. PubMed PMID: 34695163; PubMed Central PMCID:  
801 PMCPMC8568172.
- 802 36. Go CD, Knight JDR, Rajasekharan A, Rathod B, Hesketh GG, Abe KT, et al. A proximity-  
803 dependent biotinylation map of a human cell. *Nature.* 2021;595(7865):120-4. Epub  
804 2021/06/04. doi: 10.1038/s41586-021-03592-2. PubMed PMID: 34079125.
- 805 37. Kelley LA, Mezulis S, Yates CM, Wass MN, Sternberg MJ. The Phyre2 web portal for  
806 protein modeling, prediction and analysis. *Nat Protoc.* 2015;10(6):845-58. Epub 2015/05/08.  
807 doi: 10.1038/nprot.2015.053. PubMed PMID: 25950237; PubMed Central PMCID:  
808 PMCPMC5298202.
- 809 38. Jumper J, Evans R, Pritzel A, Green T, Figurnov M, Ronneberger O, et al. Highly  
810 accurate protein structure prediction with AlphaFold. *Nature.* 2021;596(7873):583-9. Epub  
811 2021/07/16. doi: 10.1038/s41586-021-03819-2. PubMed PMID: 34265844; PubMed Central  
812 PMCID: PMCPMC8371605.
- 813 39. Nicastro G, Taylor IA, Ramos A. KH-RNA interactions: back in the groove. *Curr Opin*  
814 *Struct Biol.* 2015;30:63-70. Epub 2015/01/28. doi: 10.1016/j.sbi.2015.01.002. PubMed  
815 PMID: 25625331.
- 816 40. Braddock DT, Louis JM, Baber JL, Levens D, Clore GM. Structure and dynamics of KH  
817 domains from FBP bound to single-stranded DNA. *Nature.* 2002;415(6875):1051-6. Epub  
818 2002/03/05. doi: 10.1038/4151051a. PubMed PMID: 11875576.

- 819 41. Nicastro G, Candel AM, Uhl M, Oregioni A, Hollingworth D, Backofen R, et al.  
820 Mechanism of beta-actin mRNA Recognition by ZBP1. *Cell reports*. 2017;18(5):1187-99.  
821 Epub 2017/02/02. doi: 10.1016/j.celrep.2016.12.091. PubMed PMID: 28147274; PubMed  
822 Central PMCID: PMC5300891.
- 823 42. Diaz-Moreno I, Hollingworth D, Kelly G, Martin S, Garcia-Mayoral M, Briata P, et al.  
824 Orientation of the central domains of KSRP and its implications for the interaction with the  
825 RNA targets. *Nucleic Acids Res*. 2010;38(15):5193-205. Epub 2010/04/14. doi:  
826 10.1093/nar/gkq216. PubMed PMID: 20385598; PubMed Central PMCID: PMC2926597.
- 827 43. Chao JA, Patskovsky Y, Patel V, Levy M, Almo SC, Singer RH. ZBP1 recognition of beta-  
828 actin zipcode induces RNA looping. *Genes Dev*. 2010;24(2):148-58. Epub 2010/01/19. doi:  
829 10.1101/gad.1862910. PubMed PMID: 20080952; PubMed Central PMCID:  
830 PMC2807350.
- 831 44. Dagil R, Ball NJ, Ogradowicz RW, Hobor F, Purkiss AG, Kelly G, et al. IMP1 KH1 and  
832 KH2 domains create a structural platform with unique RNA recognition and re-modelling  
833 properties. *Nucleic Acids Res*. 2019;47(8):4334-48. Epub 2019/03/14. doi:  
834 10.1093/nar/gkz136. PubMed PMID: 30864660; PubMed Central PMCID: PMC6486635.
- 835 45. Gough J, Karplus K, Hughey R, Chothia C. Assignment of homology to genome  
836 sequences using a library of hidden Markov models that represent all proteins of known  
837 structure. *J Mol Biol*. 2001;313(4):903-19. Epub 2001/11/08. doi: 10.1006/jmbi.2001.5080.  
838 PubMed PMID: 11697912.
- 839 46. Howe KL, Achuthan P, Allen J, Allen J, Alvarez-Jarreta J, Amode MR, et al. Ensembl  
840 2021. *Nucleic Acids Res*. 2021;49(D1):D884-D91. Epub 2020/11/03. doi:  
841 10.1093/nar/gkaa942. PubMed PMID: 33137190; PubMed Central PMCID:  
842 PMC7778975.
- 843 47. Oddone A, Lorentzen E, Basquin J, Gasch A, Rybin V, Conti E, et al. Structural and  
844 biochemical characterization of the yeast exosome component Rrp40. *EMBO Rep*.  
845 2007;8(1):63-9. Epub 2006/12/13. doi: 10.1038/sj.embor.7400856. PubMed PMID:  
846 17159918; PubMed Central PMCID: PMC1796750.
- 847 48. Nakel K, Hartung SA, Bonneau F, Eckmann CR, Conti E. Four KH domains of the *C.*  
848 *elegans* Bicaudal-C ortholog GLD-3 form a globular structural platform. *RNA*.  
849 2010;16(11):2058-67. Epub 2010/09/09. doi: 10.1261/rna.2315010. PubMed PMID:  
850 20823118; PubMed Central PMCID: PMC2957046.
- 851 49. Hollingworth D, Candel AM, Nicastro G, Martin SR, Briata P, Gherzi R, et al. KH  
852 domains with impaired nucleic acid binding as a tool for functional analysis. *Nucleic Acids*  
853 *Res*. 2012;40(14):6873-86. Epub 2012/05/02. doi: 10.1093/nar/gks368. PubMed PMID:  
854 22547390; PubMed Central PMCID: PMC3413153.
- 855 50. Gebauer F, Schwarzl T, Valcarcel J, Hentze MW. RNA-binding proteins in human  
856 genetic disease. *Nat Rev Genet*. 2021;22(3):185-98. Epub 2020/11/26. doi: 10.1038/s41576-  
857 020-00302-y. PubMed PMID: 33235359.
- 858 51. Nagaraj N, Wisniewski JR, Geiger T, Cox J, Kircher M, Kelso J, et al. Deep proteome  
859 and transcriptome mapping of a human cancer cell line. *Molecular systems biology*.  
860 2011;7:548. Epub 2011/11/10. doi: 10.1038/msb.2011.81. PubMed PMID: 22068331;  
861 PubMed Central PMCID: PMC3261714.
- 862 52. Ryman KD, Meier KC, Nangle EM, Ragsdale SL, Korneeva NL, Rhoads RE, et al. Sindbis  
863 virus translation is inhibited by a PKR/RNase L-independent effector induced by alpha/beta  
864 interferon priming of dendritic cells. *J Virol*. 2005;79(3):1487-99. Epub 2005/01/15. doi:



- 865 10.1128/JVI.79.3.1487-1499.2005. PubMed PMID: 15650175; PubMed Central PMCID:  
866 PMCPMC544143.
- 867 53. Nchioua R, Kmiec D, Muller JA, Conzelmann C, Gross R, Swanson CM, et al. SARS-  
868 CoV-2 Is Restricted by Zinc Finger Antiviral Protein despite Preadaptation to the Low-CpG  
869 Environment in Humans. *mBio*. 2020;11(5):e01930-20. Epub 2020/10/18. doi:  
870 10.1128/mBio.01930-20. PubMed PMID: 33067384; PubMed Central PMCID:  
871 PMCPMC7569149.
- 872 54. Guttler T, Gorlich D. Ran-dependent nuclear export mediators: a structural  
873 perspective. *EMBO J*. 2011;30(17):3457-74. Epub 2011/09/01. doi:  
874 10.1038/emboj.2011.287. PubMed PMID: 21878989; PubMed Central PMCID:  
875 PMCPMC3181476.
- 876 55. Kirli K, Karaca S, Dehne HJ, Samwer M, Pan KT, Lenz C, et al. A deep proteomics  
877 perspective on CRM1-mediated nuclear export and nucleocytoplasmic partitioning. *Elife*.  
878 2015;4. Epub 2015/12/18. doi: 10.7554/eLife.11466. PubMed PMID: 26673895; PubMed  
879 Central PMCID: PMCPMC4764573.
- 880 56. Kudo N, Wolff B, Sekimoto T, Schreiner EP, Yoneda Y, Yanagida M, et al. Leptomycin  
881 B inhibition of signal-mediated nuclear export by direct binding to CRM1. *Exp Cell Res*.  
882 1998;242(2):540-7. Epub 1998/07/31. doi: 10.1006/excr.1998.4136. PubMed PMID:  
883 9683540.
- 884 57. Liu L, Chen G, Ji X, Gao G. ZAP is a CRM1-dependent nucleocytoplasmic shuttling  
885 protein. *Biochem Biophys Res Commun*. 2004;321(3):517-23. Epub 2004/09/11. doi:  
886 10.1016/j.bbrc.2004.06.174. PubMed PMID: 15358138.
- 887 58. Guttler T, Madl T, Neumann P, Deichsel D, Corsini L, Monecke T, et al. NES consensus  
888 redefined by structures of PKI-type and Rev-type nuclear export signals bound to CRM1. *Nat*  
889 *Struct Mol Biol*. 2010;17(11):1367-76. Epub 2010/10/26. doi: 10.1038/nsmb.1931. PubMed  
890 PMID: 20972448.
- 891 59. Prieto G, Fullaondo A, Rodriguez JA. Prediction of nuclear export signals using  
892 weighted regular expressions (Wregex). *Bioinformatics*. 2014;30(9):1220-7. Epub  
893 2014/01/15. doi: 10.1093/bioinformatics/btu016. PubMed PMID: 24413524.
- 894 60. Goncalves-Carneiro D, Takata MA, Ong H, Shilton A, Bieniasz PD. Origin and  
895 evolution of the zinc finger antiviral protein. *PLoS Pathog*. 2021;17(4):e1009545. Epub  
896 2021/04/27. doi: 10.1371/journal.ppat.1009545. PubMed PMID: 33901262.
- 897 61. Antzin-Anduetza I, Mahiet C, Granger LA, Odendall C, Swanson CM. Increasing the  
898 CpG dinucleotide abundance in the HIV-1 genomic RNA inhibits viral replication.  
899 *Retrovirology*. 2017;14(1):49. Epub 2017/11/11. doi: 10.1186/s12977-017-0374-1. PubMed  
900 PMID: 29121951; PubMed Central PMCID: PMCPMC5679385.
- 901 62. Pear WS, Miller JP, Xu L, Pui JC, Soffer B, Quackenbush RC, et al. Efficient and rapid  
902 induction of a chronic myelogenous leukemia-like myeloproliferative disease in mice  
903 receiving P210 bcr/abl-transduced bone marrow. *Blood*. 1998;92(10):3780-92. Epub  
904 1998/11/10. PubMed PMID: 9808572.
- 905 63. Fouchier RA, Meyer BE, Simon JH, Fischer U, Malim MH. HIV-1 infection of non-  
906 dividing cells: evidence that the amino-terminal basic region of the viral matrix protein is  
907 important for Gag processing but not for post-entry nuclear import. *EMBO J*.  
908 1997;16(15):4531-9. Epub 1997/08/01. doi: 10.1093/emboj/16.15.4531. PubMed PMID:  
909 9303297; PubMed Central PMCID: PMCPMC1170079.
- 910 64. Chesebro B, Wehrly K, Nishio J, Perryman S. Macrophage-tropic human  
911 immunodeficiency virus isolates from different patients exhibit unusual V3 envelope

912 sequence homogeneity in comparison with T-cell-tropic isolates: definition of critical amino  
913 acids involved in cell tropism. *J Virol.* 1992;66(11):6547-54. Epub 1992/11/01. doi:  
914 10.1128/JVI.66.11.6547-6554.1992. PubMed PMID: 1404602; PubMed Central PMCID:  
915 PMCPMC240149.

916 65. Derdeyn CA, Decker JM, Sfakianos JN, Wu X, O'Brien WA, Ratner L, et al. Sensitivity  
917 of human immunodeficiency virus type 1 to the fusion inhibitor T-20 is modulated by  
918 coreceptor specificity defined by the V3 loop of gp120. *J Virol.* 2000;74(18):8358-67. Epub  
919 2000/08/23. doi: 10.1128/jvi.74.18.8358-8367.2000. PubMed PMID: 10954535; PubMed  
920 Central PMCID: PMCPMC116346.

921 66. Wei X, Decker JM, Liu H, Zhang Z, Arani RB, Kilby JM, et al. Emergence of resistant  
922 human immunodeficiency virus type 1 in patients receiving fusion inhibitor (T-20)  
923 monotherapy. *Antimicrob Agents Chemother.* 2002;46(6):1896-905. Epub 2002/05/23. doi:  
924 10.1128/aac.46.6.1896-1905.2002. PubMed PMID: 12019106; PubMed Central PMCID:  
925 PMCPMC127242.

926 67. Platt EJ, Wehrly K, Kuhmann SE, Chesebro B, Kabat D. Effects of CCR5 and CD4 cell  
927 surface concentrations on infections by macrophagetropic isolates of human  
928 immunodeficiency virus type 1. *J Virol.* 1998;72(4):2855-64. Epub 1998/04/03. doi:  
929 10.1128/JVI.72.4.2855-2864.1998. PubMed PMID: 9525605; PubMed Central PMCID:  
930 PMCPMC109730.

931 68. Edgar RC. MUSCLE: multiple sequence alignment with high accuracy and high  
932 throughput. *Nucleic Acids Res.* 2004;32(5):1792-7. Epub 2004/03/23. doi:  
933 10.1093/nar/gkh340. PubMed PMID: 15034147; PubMed Central PMCID: PMCPMC390337.

934 69. Deng W, Maust BS, Nickle DC, Learn GH, Liu Y, Heath L, et al. DIVEIN: a web server to  
935 analyze phylogenies, sequence divergence, diversity, and informative sites. *Biotechniques.*  
936 2010;48(5):405-8. Epub 2010/06/24. doi: 10.2144/000113370. PubMed PMID: 20569214;  
937 PubMed Central PMCID: PMCPMC3133969.

938 70. Letunic I, Bork P. Interactive Tree Of Life (iTOL) v5: an online tool for phylogenetic  
939 tree display and annotation. *Nucleic Acids Res.* 2021;49(W1):W293-W6. Epub 2021/04/23.  
940 doi: 10.1093/nar/gkab301. PubMed PMID: 33885785; PubMed Central PMCID:  
941 PMCPMC8265157.

942

## 943 MAIN FIGURE LEGENDS

### 944 Figure 1. The extended di-KH domain in KHNYN.

945 (A) A schematic diagram of KHNYN showing the extended di-KH domain, PIN  
946 domain and CUBAN domain. (B) Model for the extended di-KH domain. KH1, KH2  
947 and C-terminal three-helix bundle are shown in cartoon representation colored  
948 green, blue and cyan, respectively. The GxxG motif in KH2 is highlighted in stick  
949 representation in red. (C) Sequence alignment of KH1 and KH2 from the KHNYN  
950 model, FUBP1 KH3 and KH4 (PDB ID: 1J4W) and IGF2BP1 KH3 and KH4 (PDB ID:

951 2N8L). The GxxG motif between  $\alpha 1$  and  $\alpha 2$  that is absent in KHNYN KH1 is boxed in  
952 the other sequences. The  $\beta 1\alpha 1\alpha 2\beta 2\beta 3\alpha 3$  secondary structure elements for the  
953 consensus KH domain based on 3D-alignment of the structures are displayed above  
954 the aligned sequences in light blue and red. The elongated portion of  $\alpha 1$  present in  
955 KHNYN KH1 is shown in pink.

956

957 **Figure 2. The extended di-KH domain is necessary for KHNYN antiviral activity**

958 **against HIV-1<sub>CpG</sub>. (A)** Schematic representation of KHNYN $\Delta$ di-KH. **(B)** Left panel:

959 Infectious virus produced from KHNYN CRISPR HeLa cells co-transfected with HIV-

960 1<sub>WT</sub> or HIV-1<sub>CpG</sub> and increasing concentration of CRISPR-resistant wild-type pKHNYN-

961 FLAG or pKHNYN $\Delta$ di-KH-FLAG. Data are represented as mean  $\pm$  standard deviation.

962 Each point shows the average value of three independent experiments normalized to

963 the value obtained for pHIV-1<sub>WT</sub> at 0 ng pKHNYN. \* $p < 0.05$  as determined by a two-

964 tailed unpaired t-test comparing wild-type KHNYN and the mutant KHNYN at each

965 concentration in the HIV-1<sub>CpG</sub> samples. Right panel: representative western blot of

966 wild-type KHNYN-FLAG or KHNYN- $\Delta$ di-KH-FLAG protein levels at concentrations

967 corresponding to the left panel. **(C)** Representative confocal microscopy images of

968 HeLa cells transfected as above and stained with an anti-FLAG antibody (green), anti-

969 ZAP antibody (magenta) and DAPI (blue). The scale bar represents 10  $\mu$ m.

970

971 **Figure 3. KHNYN does not detectably bind RNA and does not modulate ZAP**

972 **binding to HIV-1 RNA (A)** Schematic representation of KHNYN-GDDG. **(B)** Left

973 panel: Infectious virus produced from KHNYN CRISPR HeLa cells co-transfected

974 with HIV-1<sub>WT</sub> or HIV-1<sub>CpG</sub> and increasing concentration of CRISPR-resistant wild-

975 type pKHNYN-FLAG or pKHNYN-GDDG-FLAG. Data are represented as mean  $\pm$

976 standard deviation. Each point shows the average value of three independent  
977 experiments normalized to the value obtained for pHIV-1<sub>WT</sub> at 0 ng pKHNYN. Right  
978 panel: representative western blot of wild-type KHNYN-FLAG or KHNYN-GDDG-  
979 FLAG protein levels at concentrations corresponding to the left panel. **(C)** SDS-  
980 PAGE gel of  $\gamma^{32}\text{P}$ -RNA labelled proteins from KHNYN CRISPR HeLa cells stably  
981 expressing GFP or wild-type KHNYN-GFP. After UV crosslinking and cell lysis,  
982 immunoprecipitations were performed using antibodies targeting GFP or  
983 endogenous ZAP. The background bands are RNA binding proteins that co-  
984 immunoprecipitate with ZAP. **(D)** Quantification of HIV-1 genomic RNA (gRNA)  
985 bound to ZAP after UV crosslinking and immunoprecipitation in control CRISPR  
986 cells, TRIM25 CRISPR cells or KHNYN CRISPR cells. Each bar shows the average  
987 value of three independent experiments normalized to the value obtained for HIV-  
988 1<sub>WT</sub> in each cell line. \* $p < 0.05$  as determined by a two-tailed unpaired t-test  
989 comparing HIV-1<sub>CpG</sub> to HIV-1<sub>WT</sub> in each cell line.

990

991 **Figure 4. The CUBAN domain is essential for KHNNH antiviral activity and**  
992 **protein localization. (A)** Left panel: Schematic representation of KHNYN $\Delta$ 636-678  
993 (KHNYN $\Delta$ CUBAN) and KHNYN-W647P/H651F/R664E (KHNYNmutNEDD8). The  
994 residues mutated in KHNYNmutNEDD8 are highlighted in red. Right panel: Cartoon  
995 representation of the NEDD8-CUBAN complex structure. The residues mutated in  
996 KHNYNmutNEDD8 are highlighted in stick representation in blue. **(B)** Left panel:  
997 Infectious virus production from KHNYN CRISPR HeLa cells co-transfected with  
998 pHIV-1<sub>WT</sub> or pHIV-1<sub>CpG</sub> and increasing concentration of CRISPR-resistant wild-type  
999 pKHNYN-Flag, pKHNYN $\Delta$ CUBAN-Flag or pKHNYN-mutNEDD8-Flag. Each point  
1000 shows the average value of three independent experiments normalized to the value

1001 obtained for pHIV-1<sub>WT</sub> at 0ng pKHNYN. \*p < 0.05 as determined by a two-tailed  
1002 unpaired t-test comparing wild-type KHNYN and the mutant KHNYN at each  
1003 concentration in the HIV-1<sub>CpG</sub> samples. Right panel: representative western blot of  
1004 the protein level of wild type KHNYN-FLAG, KHNYN $\Delta$ CUBAN-FLAG and  
1005 KHNYNmutNEDD8-FLAG at the concentrations shown in the left panel. **(C)** Left  
1006 panel: Infectious virus production from HeLa KHNYN CRISPR cells stably expressing  
1007 wild-type KHNYN-GFP, KHNYN $\Delta$ CUBAN-GFP or KHNYNmutNEDD8-GFP. All cell  
1008 lines were transfected with HIV-1<sub>WT</sub> or HIV-1<sub>CpG</sub>. Each bar shows the average value  
1009 of five independent experiments normalized to the value obtained for wild type  
1010 KHNYN co-transfected with pHIV-1<sub>WT</sub>. \*p < 0.05 as determined by a two-tailed  
1011 unpaired t-test comparing wild-type KHNYN and the mutant KHNYN construct in the  
1012 HIV-1<sub>CpG</sub> samples. Data are represented as mean  $\pm$  SD. Right panel: Representative  
1013 western blot for GFP showing the KHNYN-GFP protein levels in the wild-type  
1014 KHNYN-GFP, KHNYN $\Delta$ CUBAN-GFP or KHNYNmutNEDD8-GFP cell lines. **(D)** Left  
1015 panel: Confocal microscopy images of the KHNYN-GFP cell lines (green) co-stained  
1016 with endogenous ZAP (magenta), scale bar is 10 $\mu$ m. Right panel: Signal  
1017 quantification per cell (50 cells total per condition) of KHNYN nuclear and  
1018 cytoplasmic distribution in the KHNYN-GFP cell lines. \*p < 0.05 as determined by a  
1019 two-tailed unpaired t-test comparing the nuclear fraction between each sample.

1020

1021 **Figure 5. CRM1 inhibition re-localizes KHNYN to the nucleus.** Left panel:  
1022 Representative confocal microscopy images of KHNYN CRISPR HeLa cells stably  
1023 expressing either wild-type KHNYN-GFP or the indicated mutants before and after a  
1024 four-hour treatment with 50nM Leptomycin B. KHNYN-GFP is shown in green,  
1025 endogenous ZAP co-staining is shown in magenta, scale bar is 10 $\mu$ m. Right panel:

1026 Signal quantification per cell (50 cells in total per condition) of KHNYN nuclear and  
1027 cytoplasmic distribution for KHNYN-GFP or the indicated mutant protein before and  
1028 after Leptomycin B treatment. \*p < 0.05 as determined by a two-tailed unpaired t-test  
1029 comparing the nuclear fraction between each sample.

1030

1031 **Figure 6. A nuclear export signal present in the C-terminal 14 amino acids of**  
1032 **the CUBAN domain is required for KHNYN cytoplasmic location and antiviral**  
1033 **activity. (A)** Schematic representation of the KHNYN CUBAN domain and nuclear  
1034 export signal. The key residues that were mutated in KHNYN-NESmut are shown in  
1035 red. **(B)** Cartoon representation of the NEDD8-CUBAN complex structure. Residues  
1036 in the NES that were mutated to serine are shown as sticks in red. The mutations in  
1037 KHNYNmutNEDD8 that decrease KHNYN binding to NEDD8 are shown as sticks in  
1038 blue. **(C)** Left panel: Infectious virus production from KHNYN CRISPR HeLa cells  
1039 stably expressing wild-type KHNYN-GFP, KHNYN $\Delta$ CUBAN-GFP, KHNYN $\Delta$ NES-  
1040 GFP or KHNYN-NESmut-GFP transfected with HIV-1<sub>WT</sub> or HIV-1<sub>CpG</sub>. Each bar  
1041 shows the average value of three independent experiments normalized to the value  
1042 obtained for wild type KHNYN co-transfected with pHIV-1<sub>WT</sub>. \*p < 0.05 as determined  
1043 by a two-tailed unpaired t-test comparing each mutant KHNYN-GFP sample to wild  
1044 type KHNYN-GFP. Right panel: Representative western blot showing KHNYN-GFP  
1045 protein levels. **(D)** Left panel: Confocal microscopy images of the KHNYN-GFP cell  
1046 lines (green) co-stained for endogenous ZAP (magenta), scale bar is 10 $\mu$ m. Right  
1047 panel: Signal quantification per cell (50 cells total per condition) of KHNYN nuclear  
1048 and cytoplasmic distribution in the KHNYN-GFP cell lines. \*p < 0.05 as determined  
1049 by a two-tailed unpaired t-test comparing the nuclear fraction between each sample.

1050

1051 **Figure 7. The KHNYN NES in the CUBAN domain promotes its interaction with**  
1052 **ZAP and evolved at a similar time as ZAP in tetrapods. (A)** Left panel: GFP  
1053 control, KHNYN-GFP and KHNYN $\Delta$ NES-GFP HeLa cells were lysed and aliquots  
1054 were immunoblotted for GFP and endogenous ZAP. Middle panel: GFP was  
1055 immunoprecipitated in each cell lysate and blotted for GFP or endogenous ZAP.  
1056 Right panel: The amount of ZAP-L immunoprecipitated relative to the KHNYN-GFP  
1057 sample is presented in a bar graph, N = 3. \* p = <0.05 as determined by a two-tailed  
1058 unpaired t-test. **(B)** Maximum likelihood phylogenetic tree of KHNYN and N4BP1  
1059 amino acid sequences. Representative sequences from bony fish (orange),  
1060 amphibians (green), reptiles (yellow), birds (light purple) and mammals (light blue)  
1061 were aligned and maximum likelihood phylogeny was inferred using the LG  
1062 substitution model DIVEIN. The crown-of-thorns starfish and Californian sea hare  
1063 were used as outgroups to root the tree. An unpruned phylogenetic tree including all  
1064 analysed sequences, their scientific names and sequence accession numbers is  
1065 presented in Figure S6. **(C)** Alignment of the C-terminal NES residues of KHNYN  
1066 and N4BP1 from selected species. Residues in PKI-like NES positions 0 – 4 are  
1067 highlighted in green.

1068

## 1069 **SUPPLEMENTAL FIGURE LEGENDS**

1070 **Figure S1. Deletion of the extended di-KH domain reduces KHNYN antiviral**  
1071 **activity on viral gene expression.** Representative western blots for HIV-1 Gag and  
1072 Env expression in cell lysates as well as virion production for the experiments shown  
1073 in Figure 2B.

1074



1075 **Figure S2: Mutation of the GxxG motif in KH2 does not reduce KHNYN antiviral**  
1076 **activity on viral gene expression.** Representative western blots for HIV-1 Gag and  
1077 Env expression in cell lysates as well as virion production for the experiments shown  
1078 in Figure 3B.

1079

1080 **Figure S3: Characterization of KHNYN-GFP cell lines and KHNYN is not**  
1081 **required for overexpressed ZAP to bind HIV-1 RNA. (A)** Expression of proteins in  
1082 HeLa cells that have been reported to regulate ZAP RNA degradation. Data is from  
1083 reference [51]. **(B)** Control CRISPR, ZAP CRISPR, KHNYN CRISPR or KHNYN  
1084 CRISPR + KHNYN-GFP cells were infected with VSV-G pseudotyped HIV-1<sub>WT</sub> or  
1085 HIV-1<sub>CpG</sub> with an MOI of 1. 48 hours post-infection, cell supernatant was harvested  
1086 and infectious virus production was measured in TZM-bl cells. Each bar shows the  
1087 average value of three independent experiments normalized to the value obtained  
1088 for wild-type KHNYN co-transfected with pHIV-1<sub>WT</sub>. \*p < 0.05 as determined by a  
1089 two-tailed unpaired t-test comparing HIV-1<sub>CpG</sub> in each cell line to the control CRISPR  
1090 cell line. **(C)** Western blot for KHNYN in control CRISPR, KHNYN CRISPR and  
1091 KHNYN CRISPR + KHNYN-GFP cells. **(D)** Quantification of HIV-1 genomic RNA  
1092 (gRNA) bound to ZAP after crosslinking and immunoprecipitation in control CRISPR  
1093 cells, TRIM25 CRISPR cells or KHNYN CRISPR cells co-transfected with pZAP-L  
1094 and either pHIV-1<sub>WT</sub> or pHIV-1<sub>CpG</sub>. Each bar shows the average value of three  
1095 independent experiments normalized to the value obtained for pHIV-1<sub>WT</sub> in each cell  
1096 line. \*p < 0.05 as determined by a two-tailed unpaired t-test comparing HIV-1<sub>CpG</sub> to  
1097 HIV-1<sub>WT</sub> in each cell line.

1098



1099 **Figure S4. The C-terminal CUBAN domain is essential for KHNYN antiviral**  
1100 **activity on viral gene expression. (A)** Representative western blots for Gag and  
1101 Env in cell lysates as well as virion production for the experiments shown in Figure  
1102 4B. **(B)** Representative western blots for Gag and Env in cell lysates as well as virion  
1103 production for the experiments shown in Figure 4C.

1104

1105 **Figure S5. The nuclear export signal at the C-terminus of the KHNYN CUBAN**  
1106 **domain is required for antiviral activity on viral gene expression. (A)**  
1107 Representative western blots for Gag and Env in cell lysates as well as virion  
1108 production for the experiments shown in Figure 6C. **(B)** Confocal microscopy images  
1109 for wild-type KHNYN-GFP, KHNYN $\Delta$ CUBAN-GFP, KHNYN- $\Delta$ NES and KHNYN-  
1110 NESmut-GFP (green) co-staining with endogenous TRIM25 (magenta), scale bar is  
1111 10 $\mu$ m.

1112

1113 **Figure S6. The nuclear export signal in KHNYN is conserved in mammals,**  
1114 **reptiles and amphibians.** Maximum likelihood phylogenetic tree of KHNYN and  
1115 N4BP1 amino acid sequences. Representative sequences from bony fish (orange),  
1116 amphibians (green), reptiles (yellow), birds (light purple) and mammals (light blue)  
1117 were aligned and maximum likelihood phylogeny was inferred using the LG  
1118 substitution model DIVEIN. The crown-of-thorns starfish and Californian sea hare  
1119 were used as outgroups to root the tree. (+) all five positions of the PKI-type NES in  
1120 the C-terminus of KHNYN are present in the lineage. (-) positions 3 and 4 in the NES  
1121 are not present in the lineage.

A

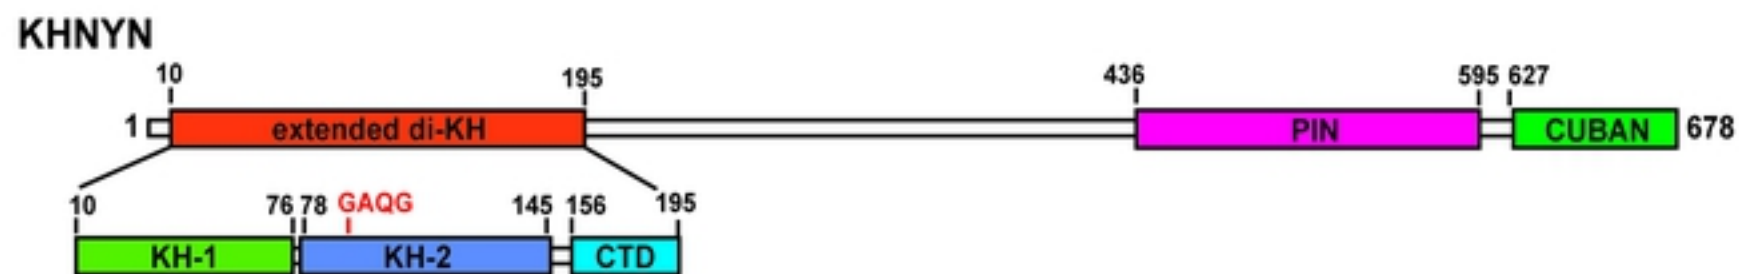

B

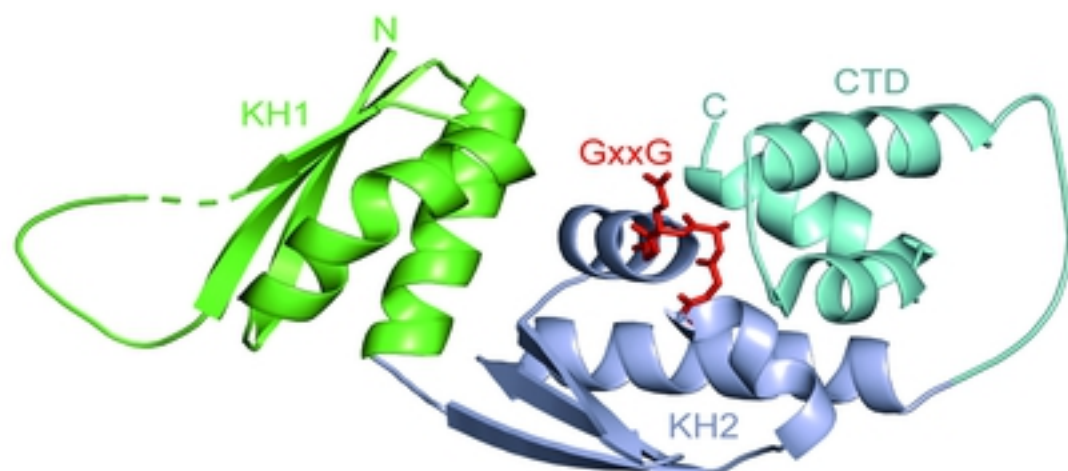

C

bioRxiv preprint doi: <https://doi.org/10.1101/2021.12.22.473955>; this version posted December 24, 2021. The copyright holder for this preprint (which was not certified by peer review) is the author/funder, who has granted bioRxiv a license to display the preprint in perpetuity. It is made available under aCC-BY 4.0 International license.

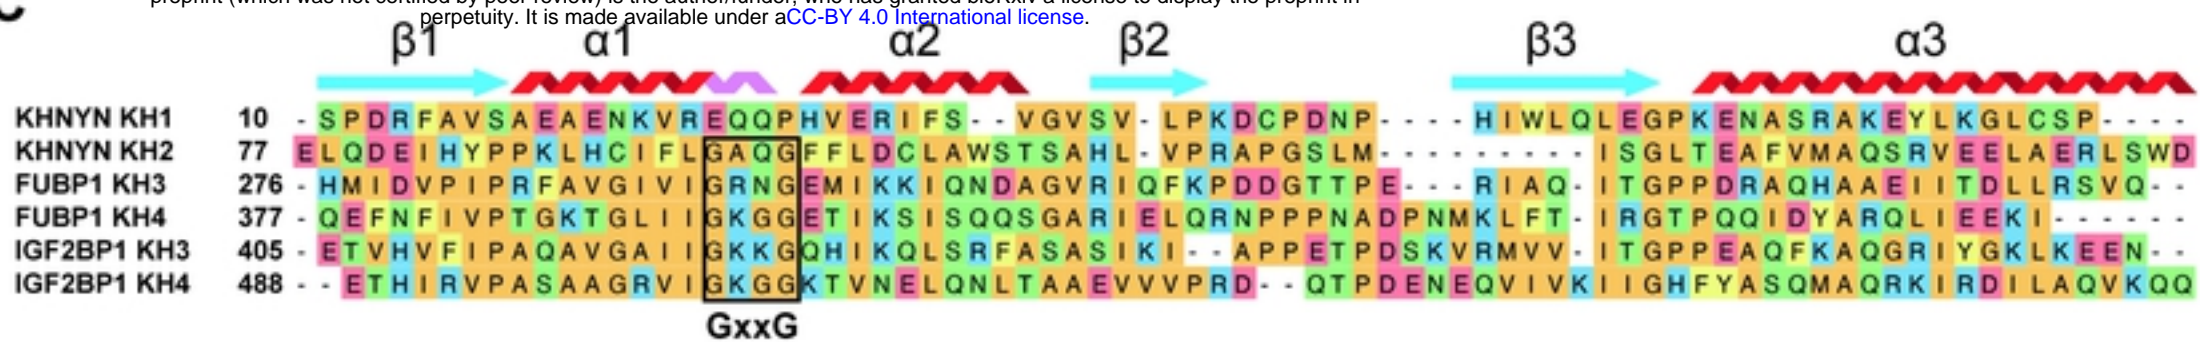

Figure 1

Figure 1

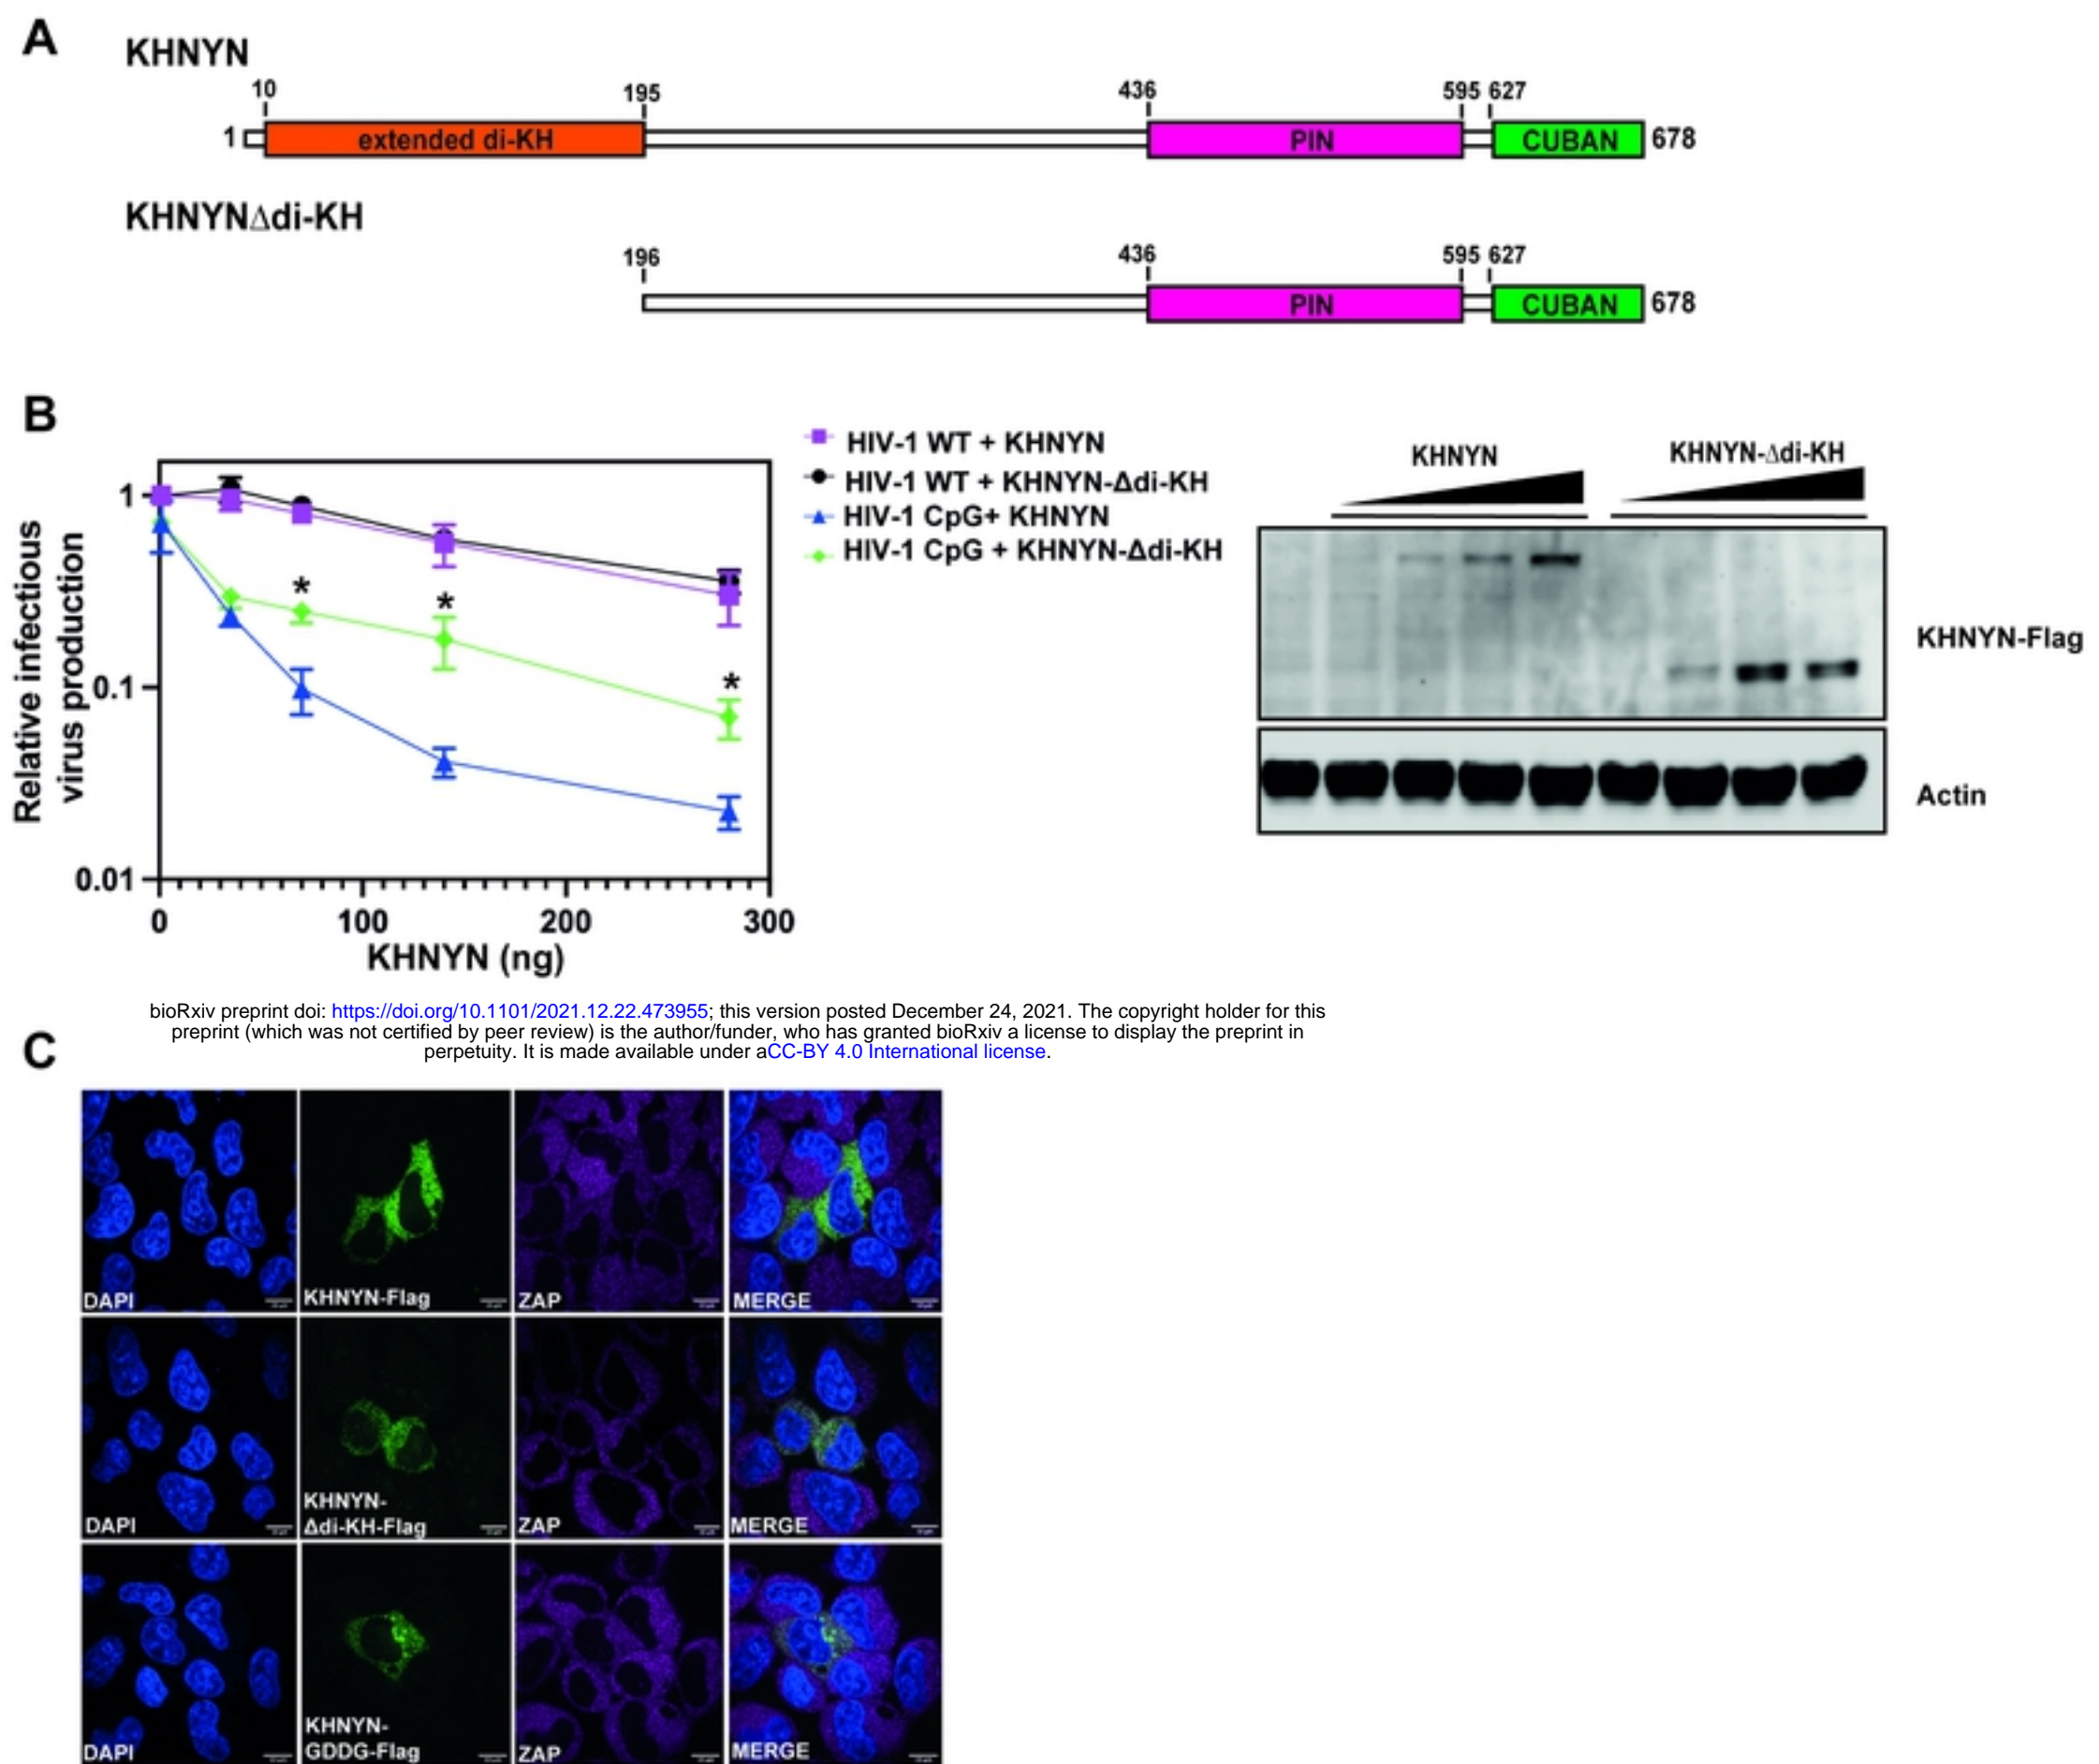

Figure 2



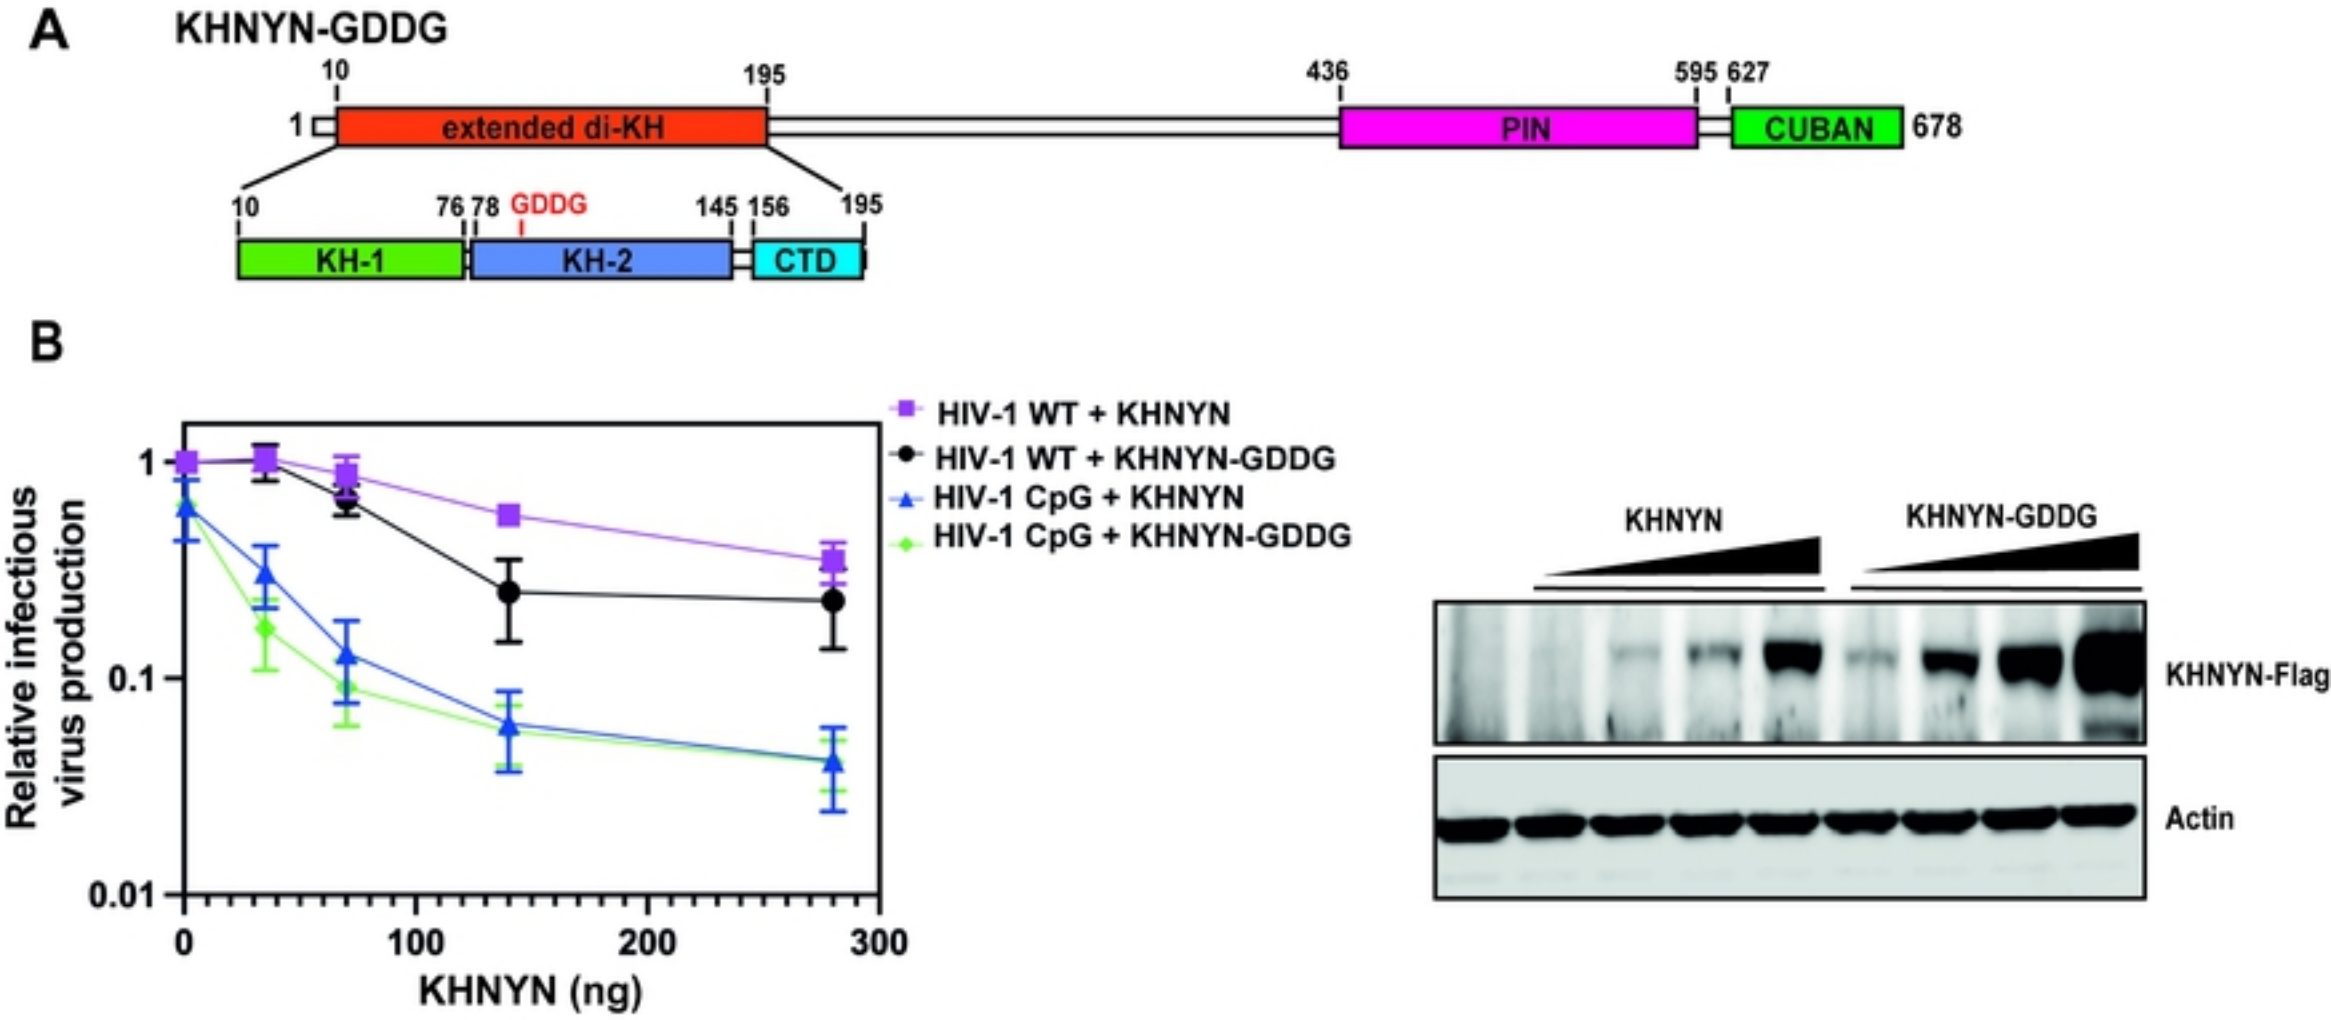

bioRxiv preprint doi: <https://doi.org/10.1101/2021.12.22.473955>; this version posted December 24, 2021. The copyright holder for this preprint (which was not certified by peer review) is the author/funder, who has granted bioRxiv a license to display the preprint in perpetuity. It is made available under aCC-BY 4.0 International license.

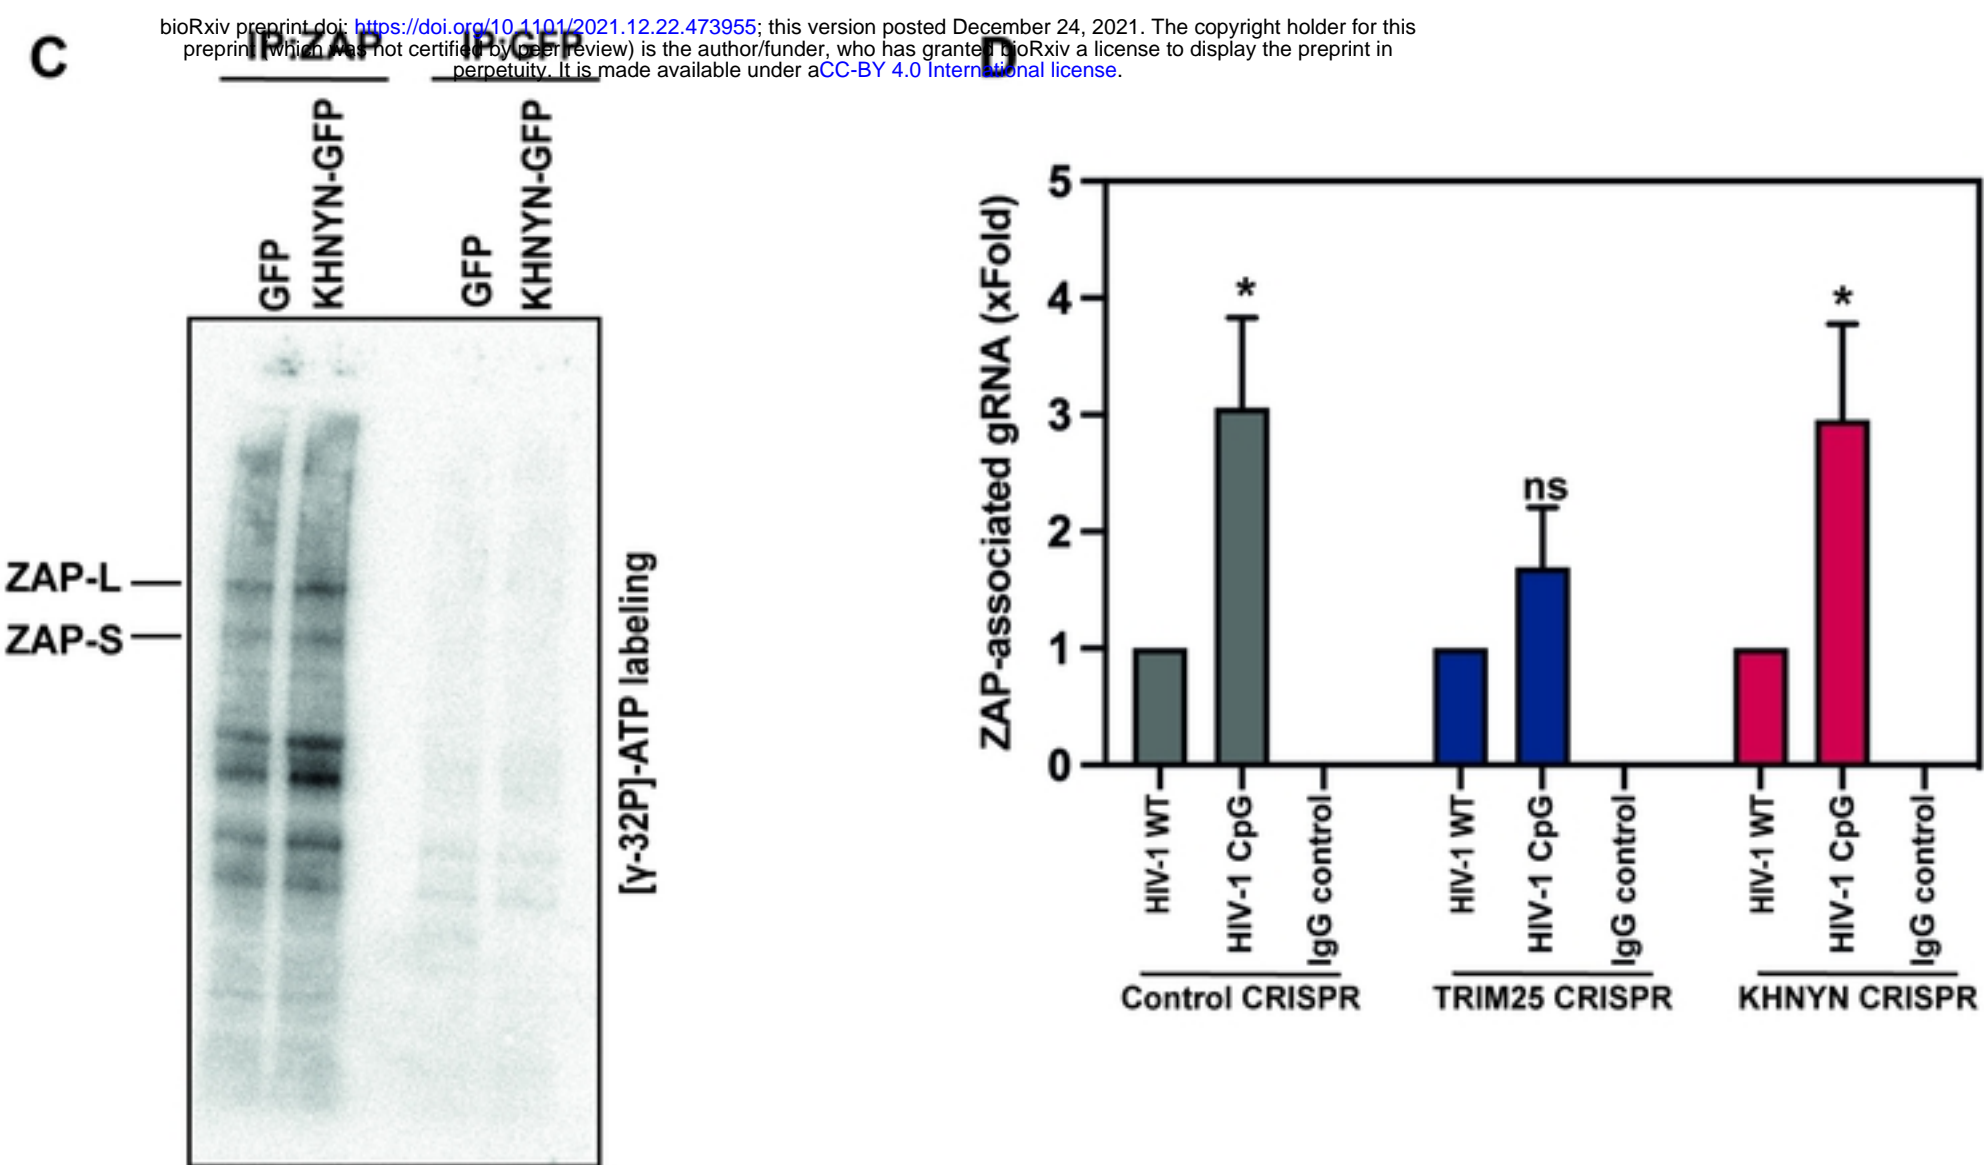

Figure 3

Figure 3

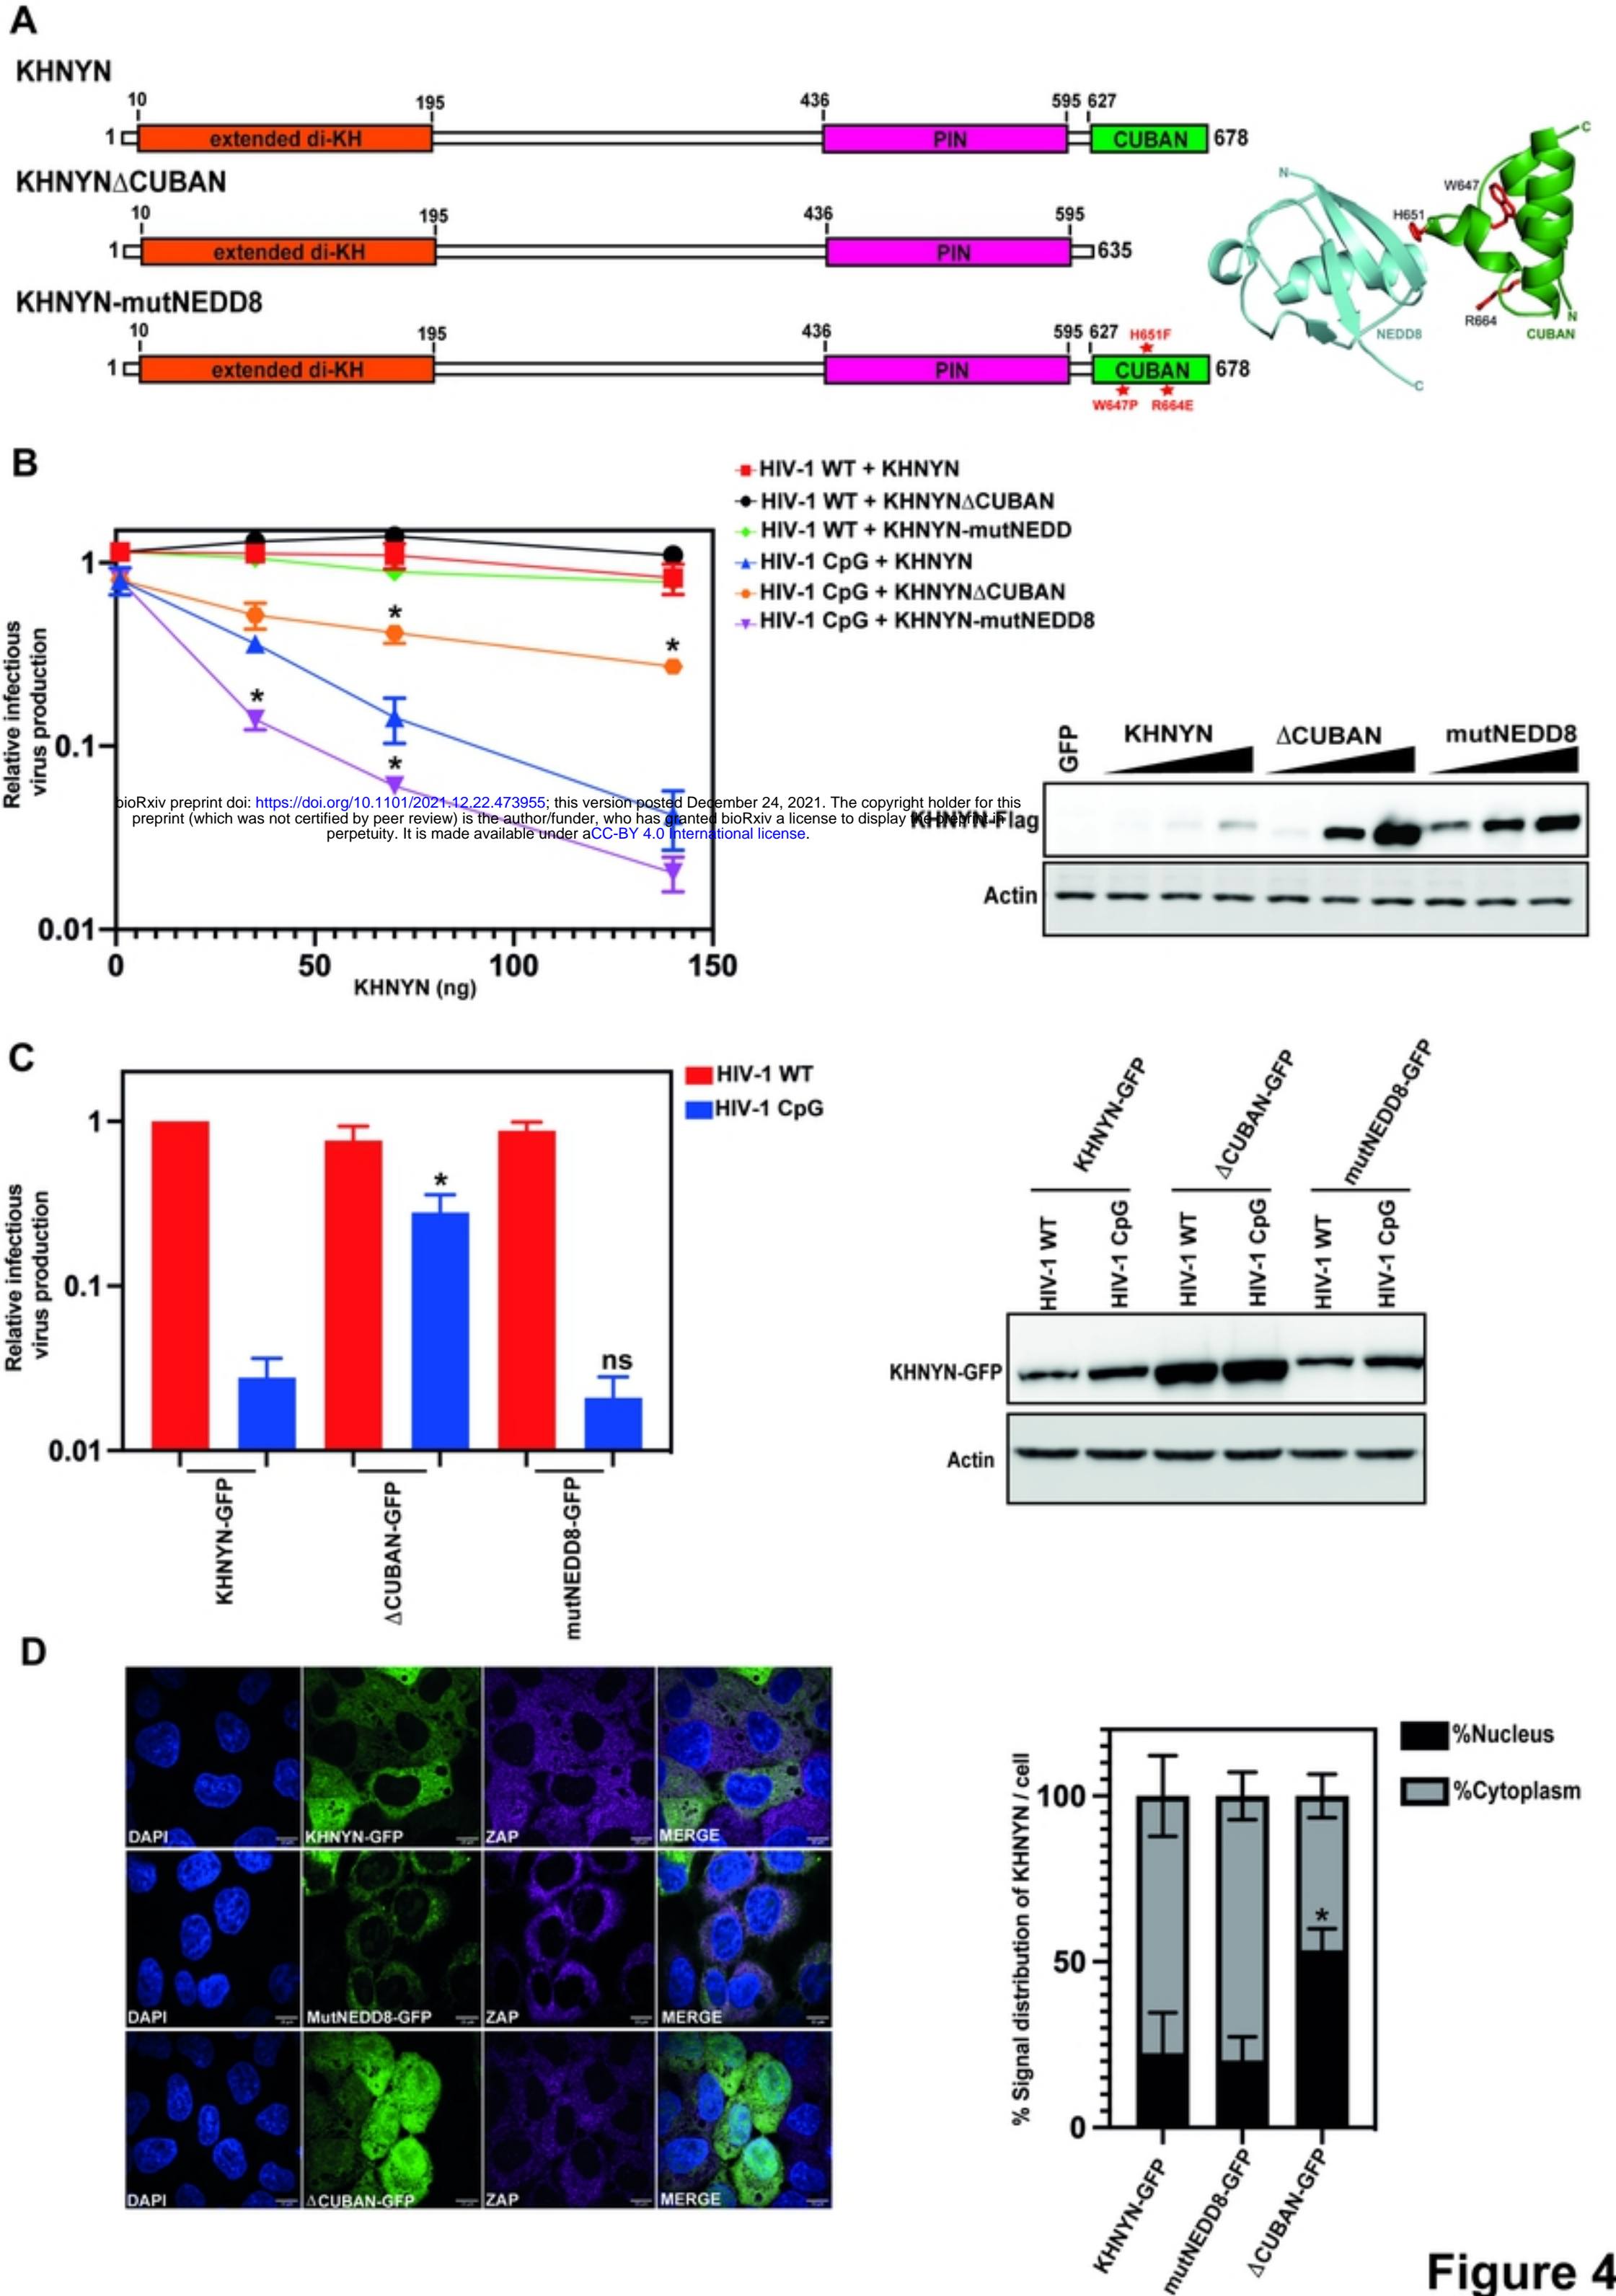

Figure 4

Figure 4



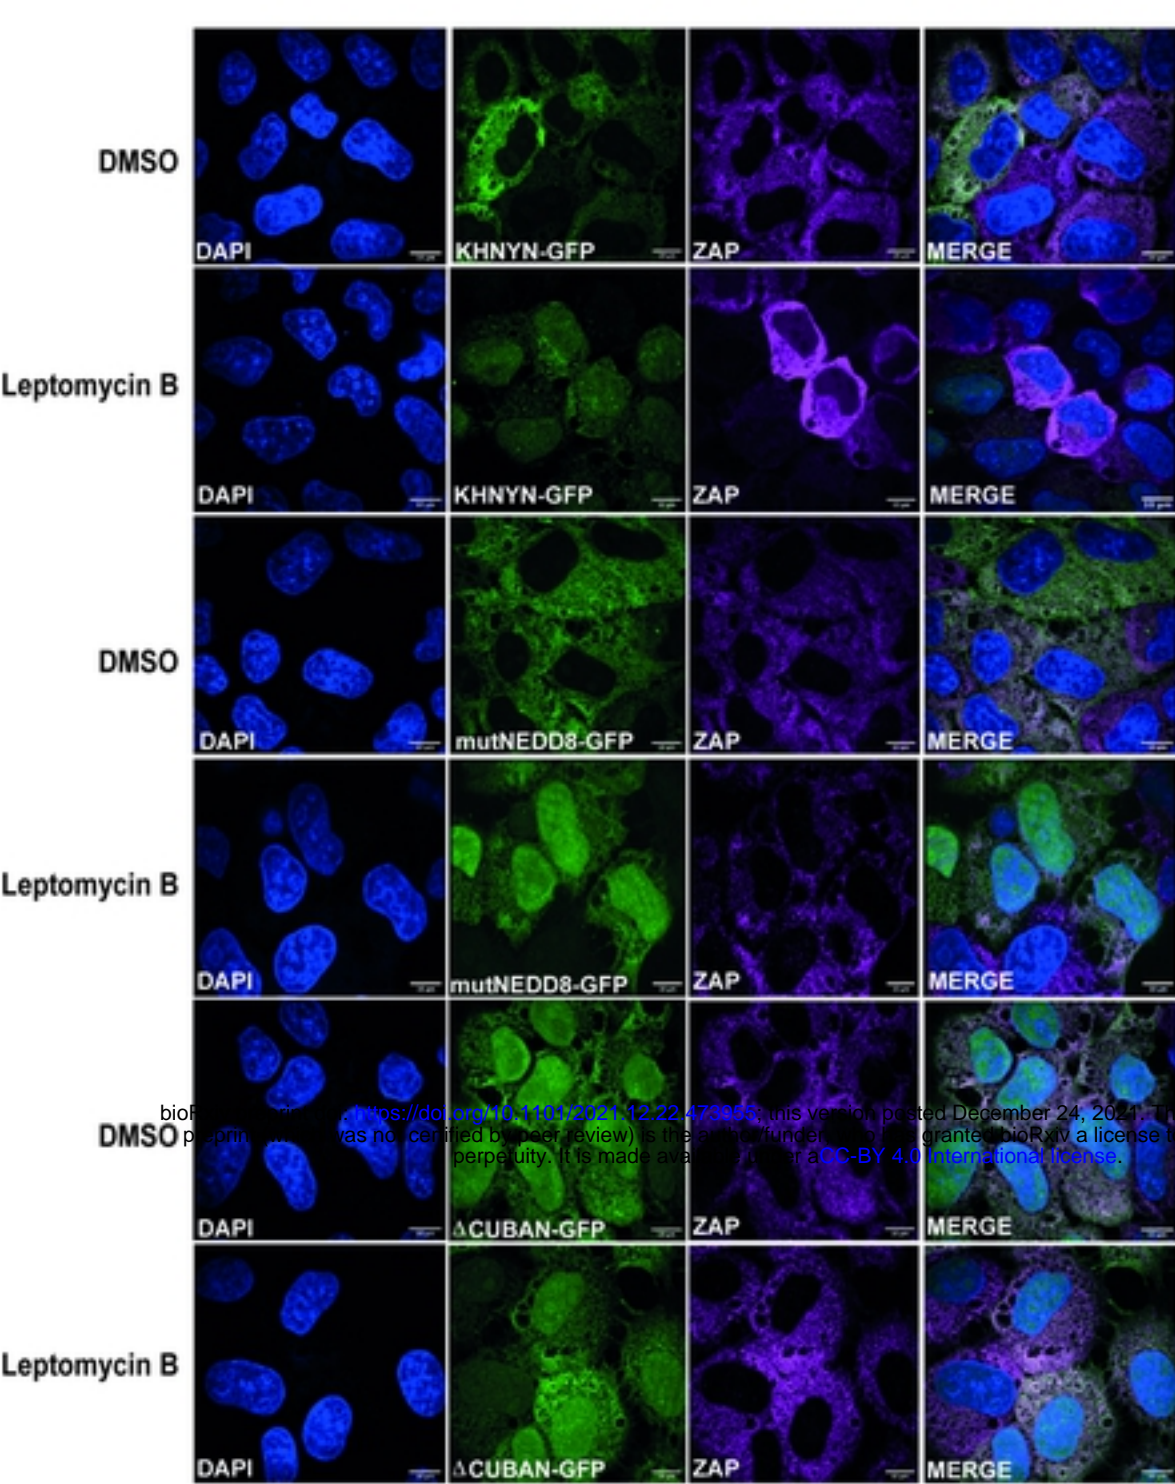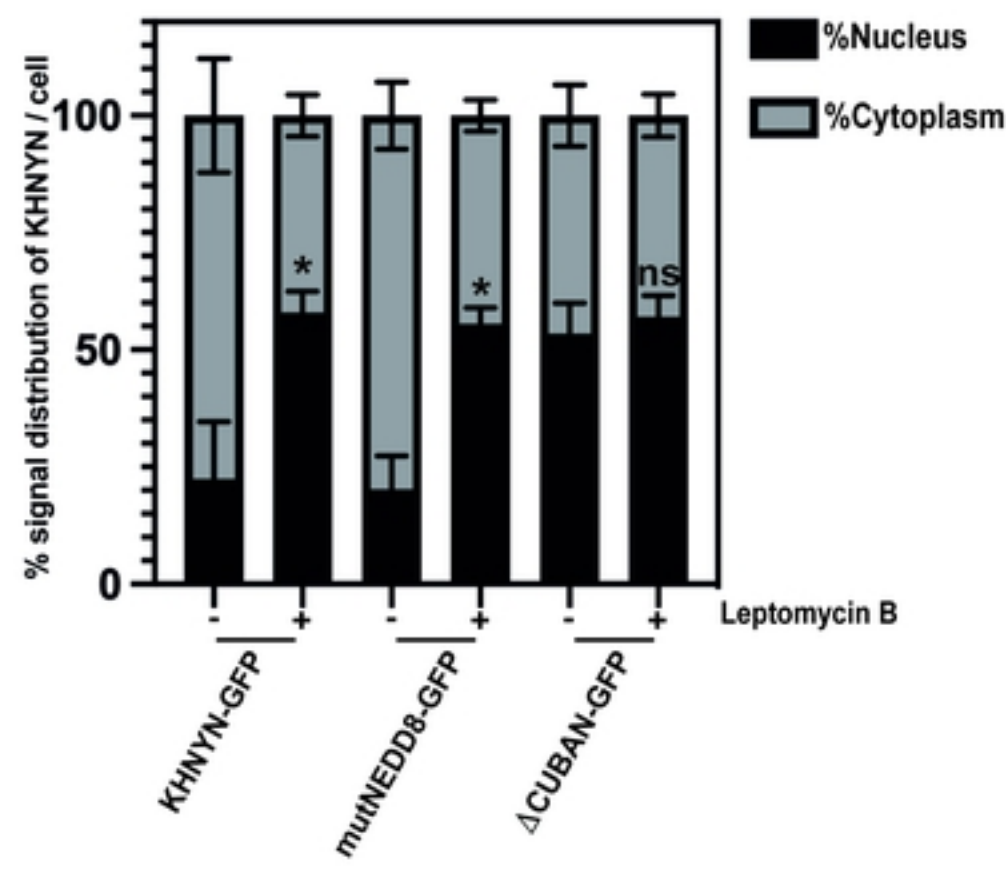

Figure 5

Figure 5

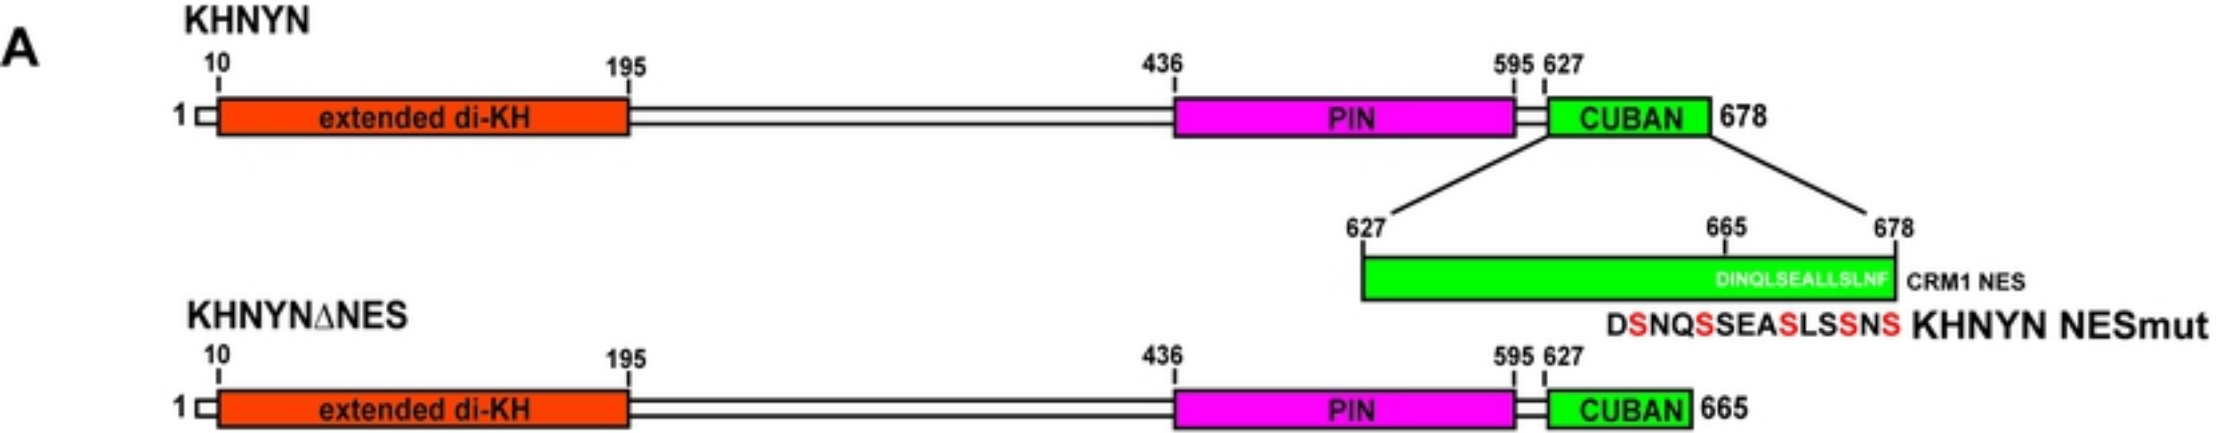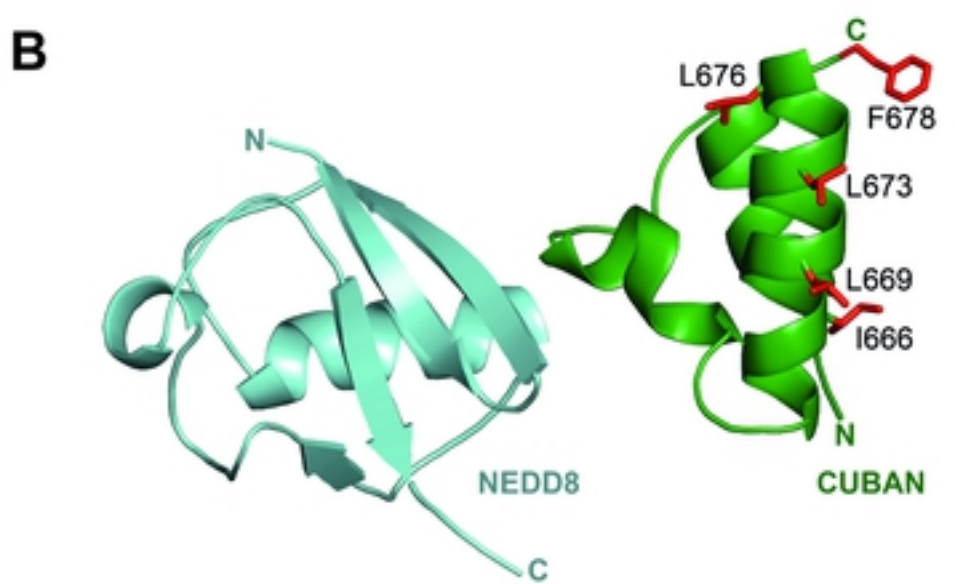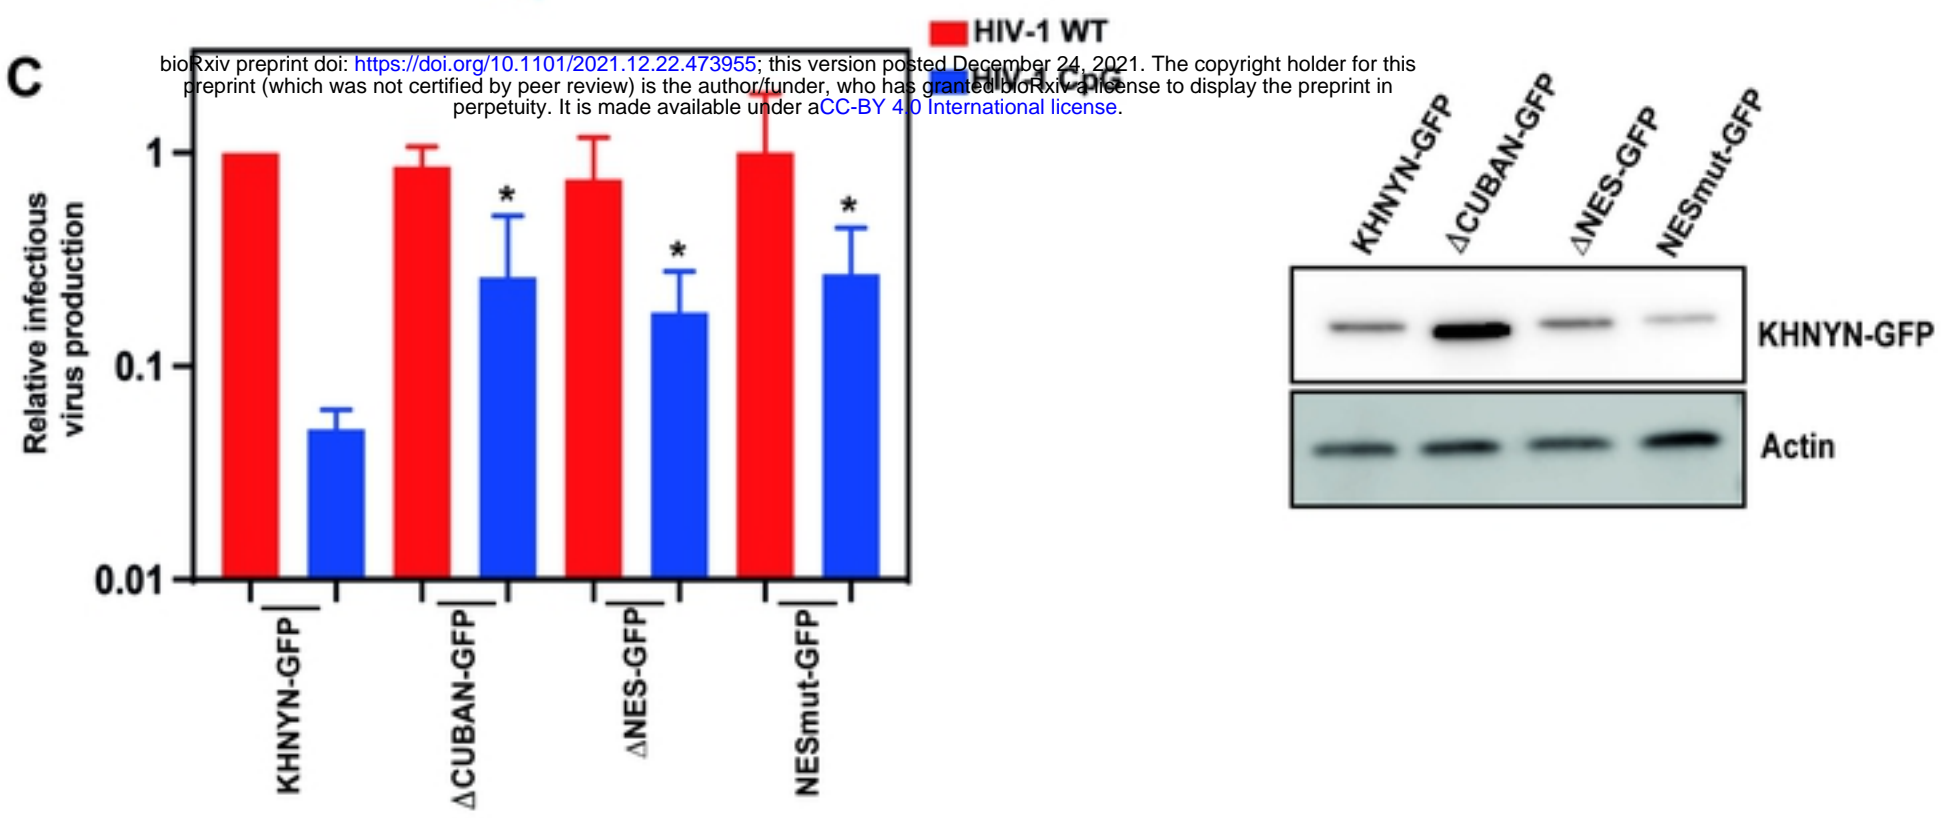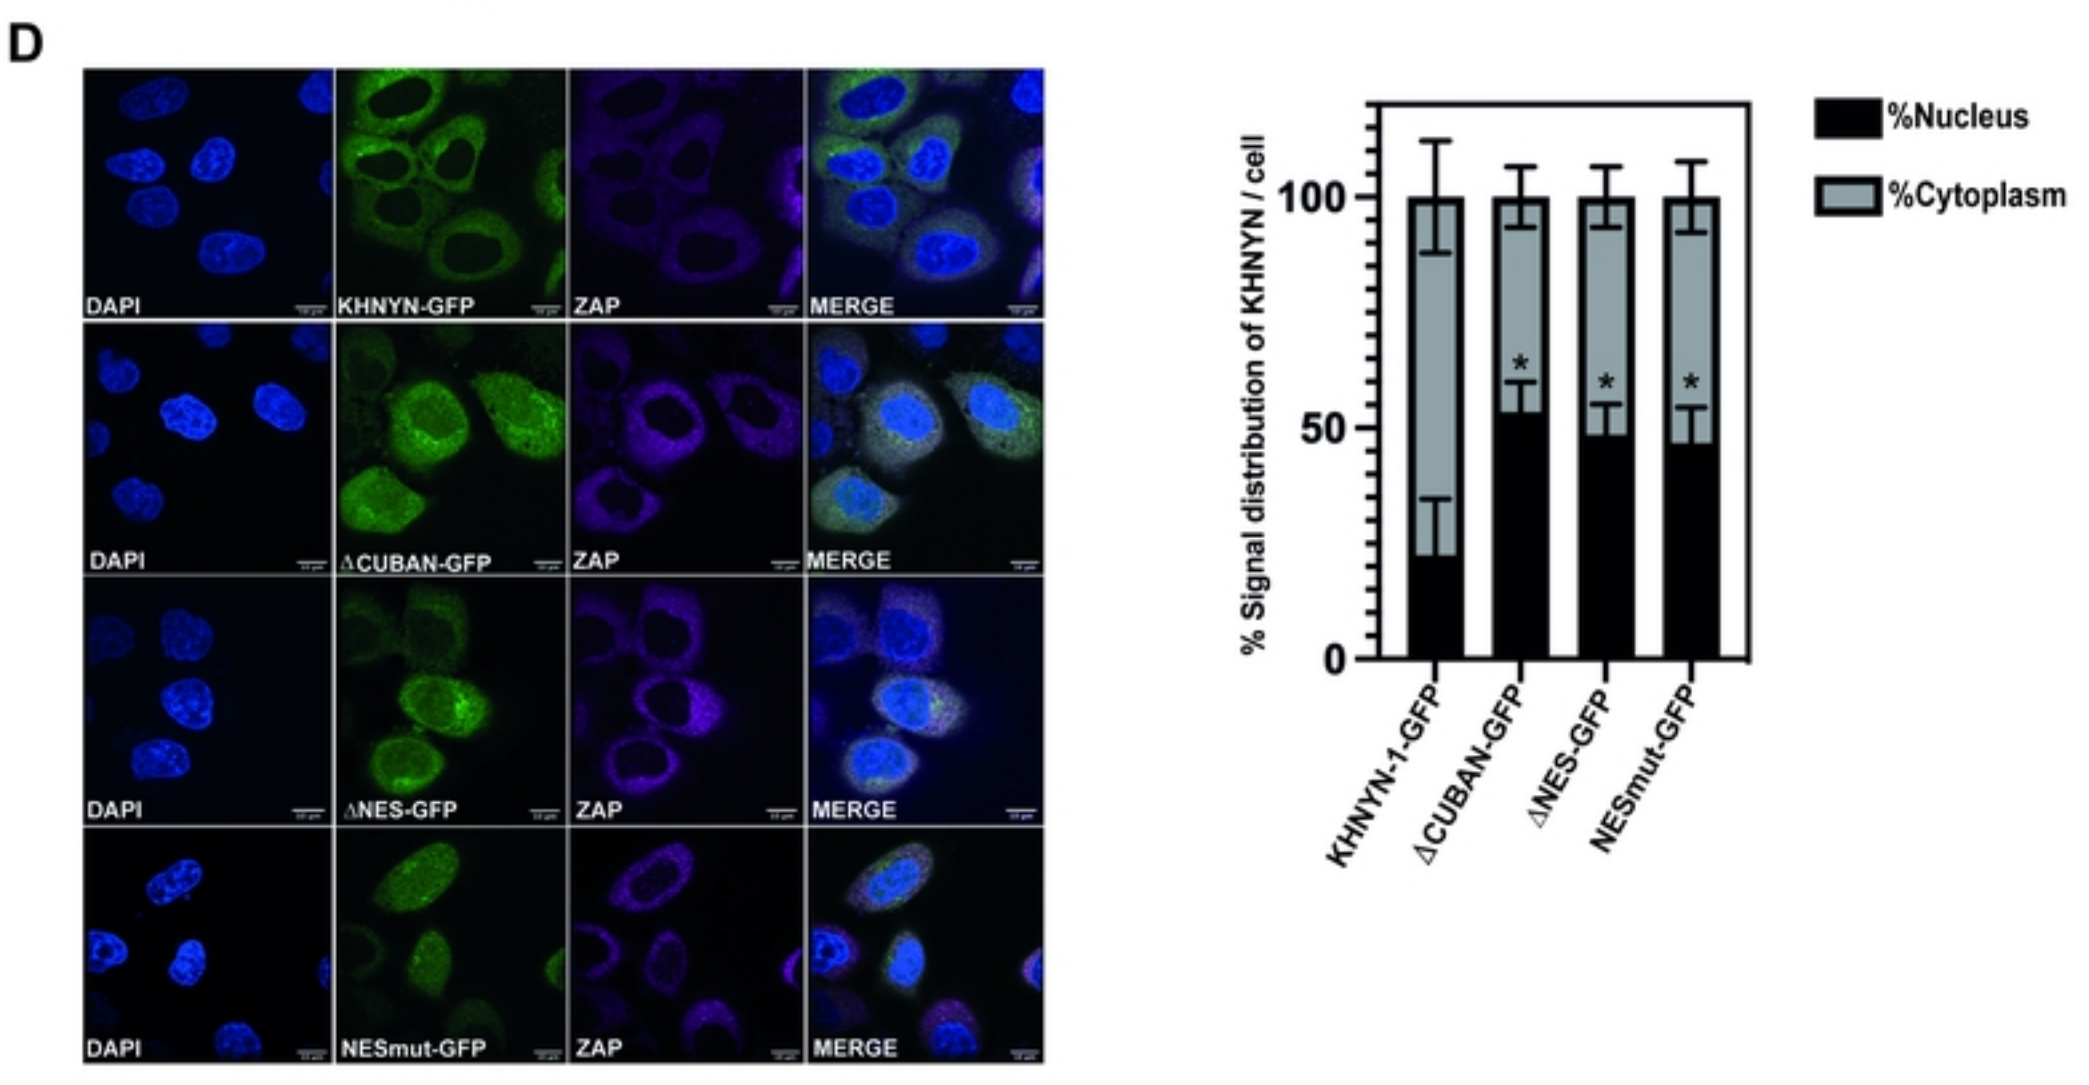

Figure 6

Figure 6



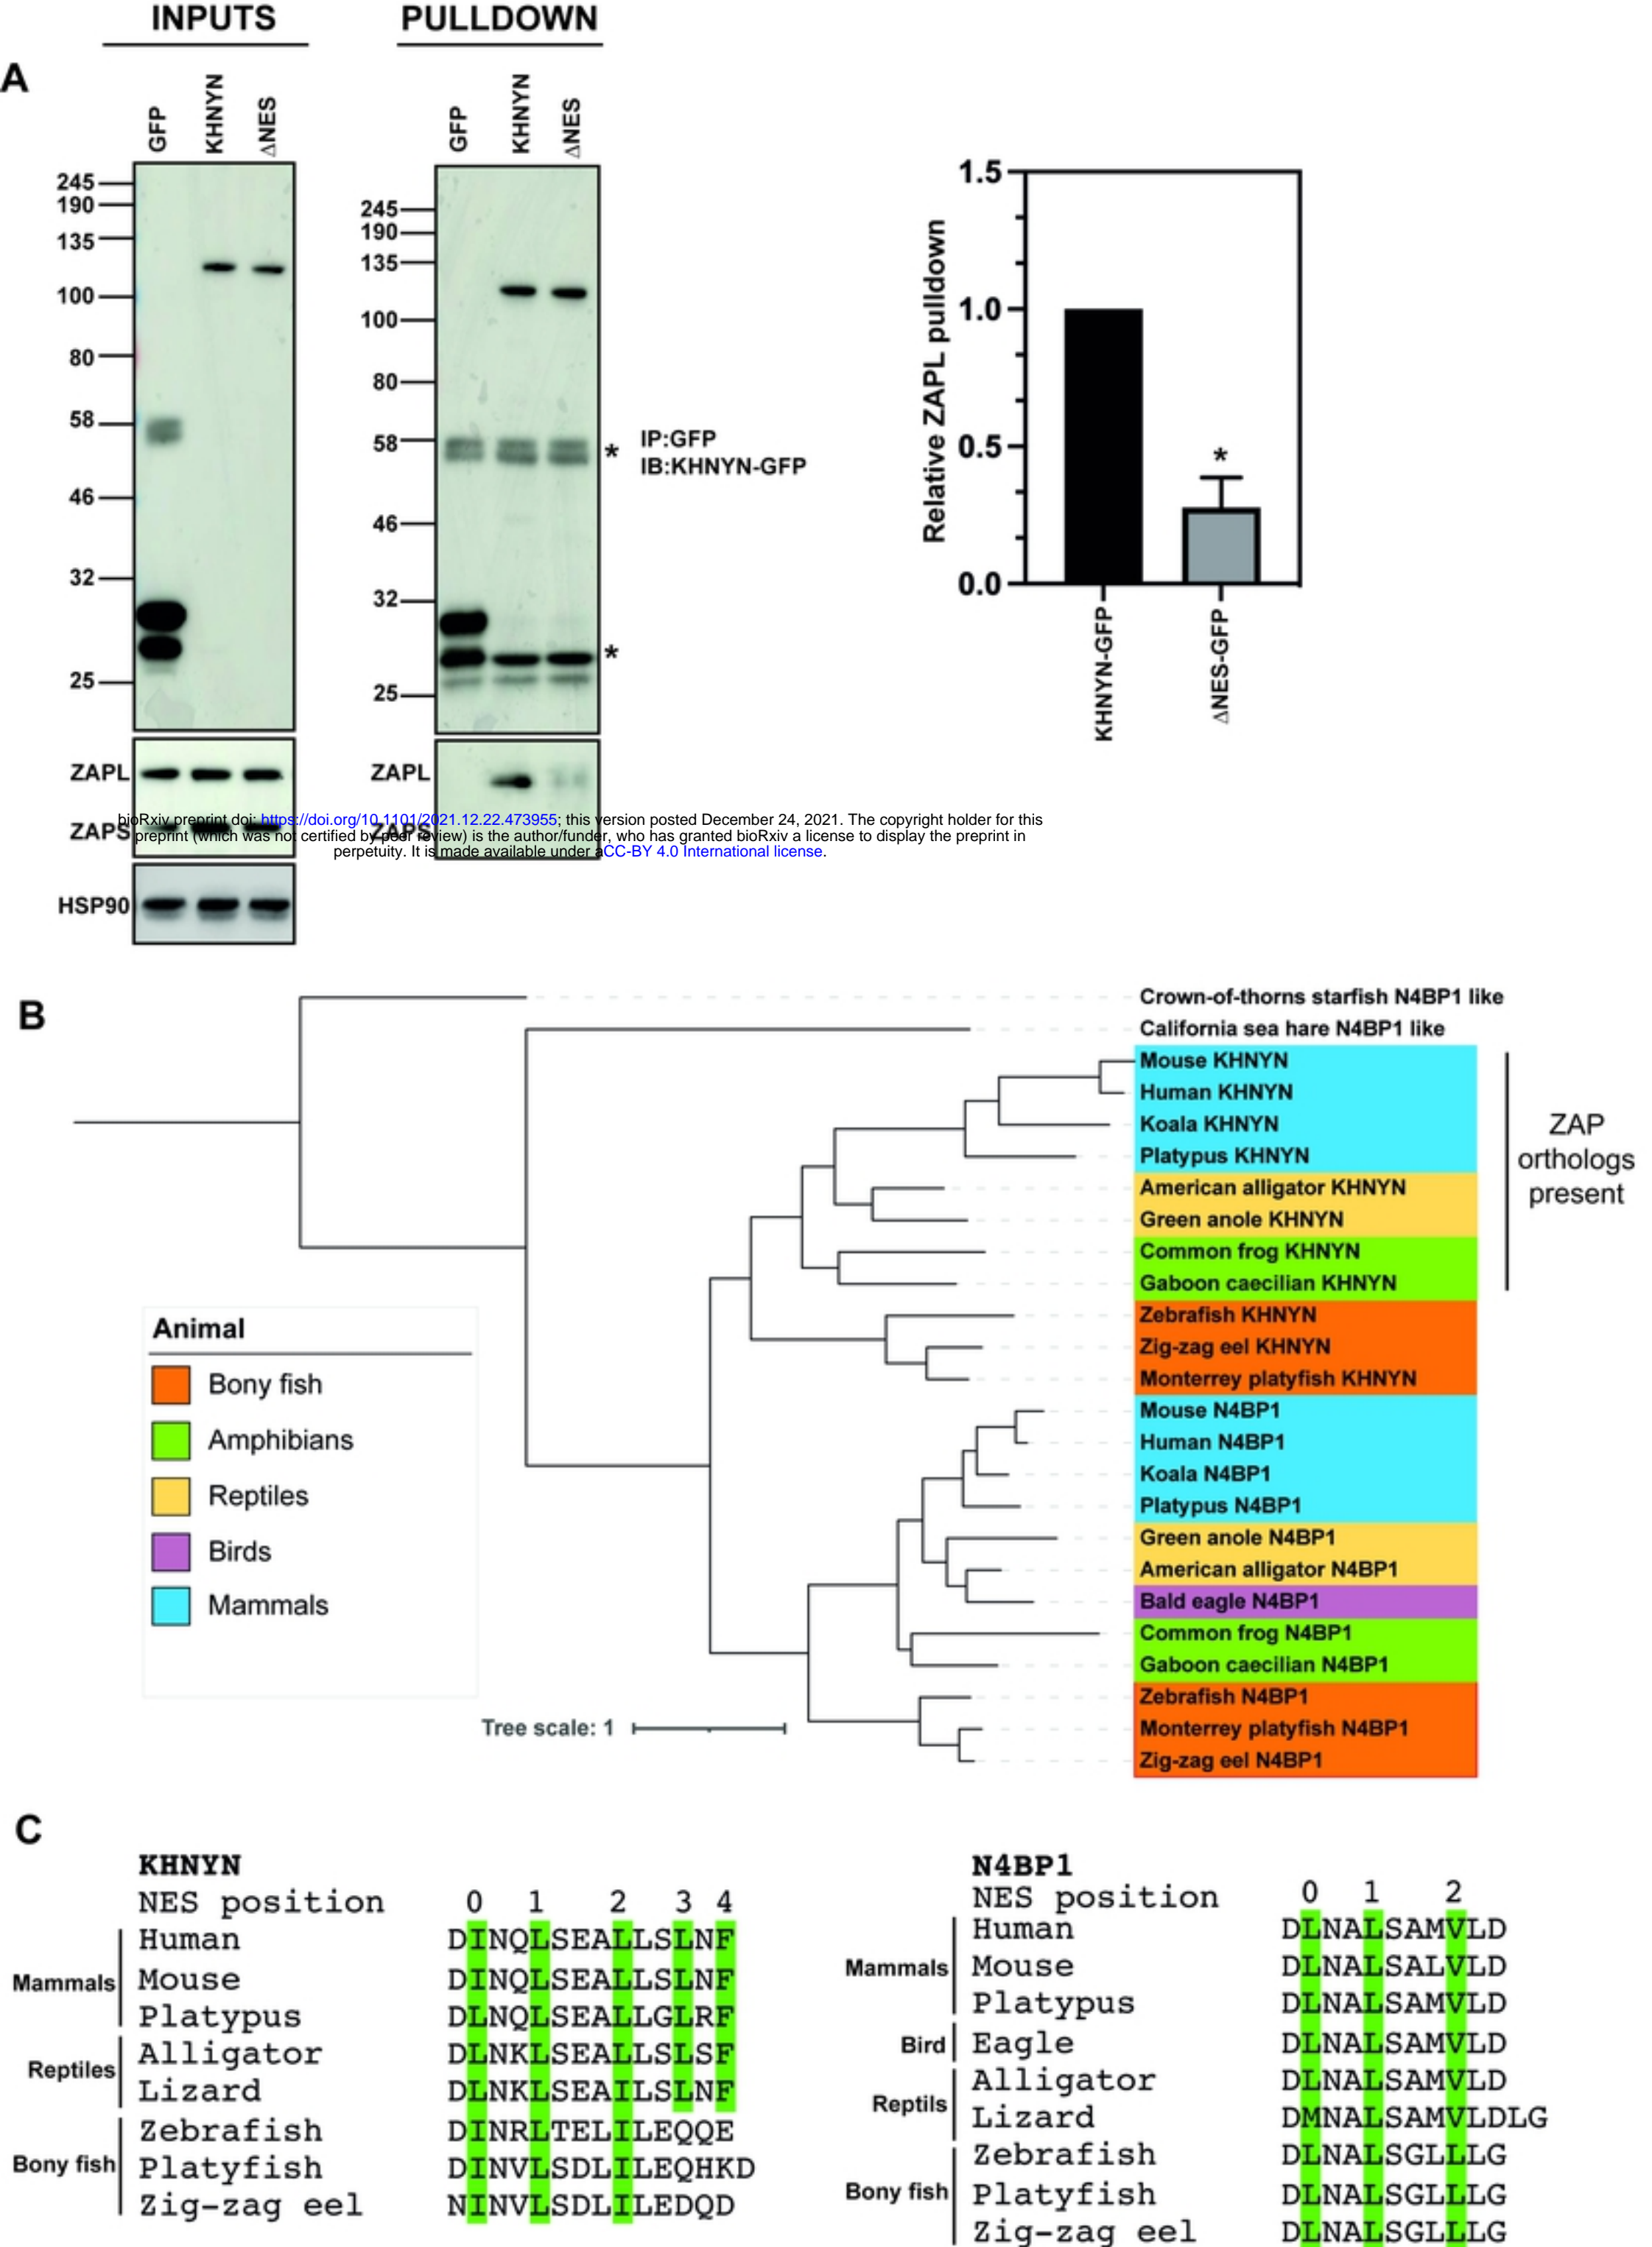

**Figure 7**
